# Supplementary material for: Integrative analysis of Iso-Seq and RNA-seq data reveals transcriptome complexity and differentially expressed transcripts in sheep tail fat
Source: PeerJ. 2021 Nov 3;9:e12454. doi: 10.7717/peerj.12454 (PMC8571958; doi:10.7717/peerj.12454)
Supplement: Supplemental Information 1 [file peerj-09-12454-s001.xlsx]

## Sheet: Sheet1
Animal ID	Group	Live weight (kg)	Carcas weight(kg)	Tail fat(kg)
A030	DHH	42.6	24.2	0.921
A045	DHH	40.8	23	0.539
A054	DHH	41.2	24	0.879
A079	DDH	44.2	23	0.15
A083	DDH	42.6	23.6	0.106
A090	DDH	35.6	19.4	0.086
