# Supplementary material for: Integrative analysis of Iso-Seq and RNA-seq data reveals transcriptome complexity and differentially expressed transcripts in sheep tail fat
Source: PeerJ. 2021 Nov 3;9:e12454. doi: 10.7717/peerj.12454 (PMC8571958; doi:10.7717/peerj.12454)
Supplement: Supplemental Information 5 [file peerj-09-12454-s005.xlsx]

## Sheet: APA
gene	strand	aligned reads	num sites	locations
ENSOARG00020025751	-	103	9	4.32203e+71
ENSOARG00020017413	+	1475	9	6.26482e+71
ENSOARG00020017607	-	2970	8	6.28256e+63
ENSOARG00020023857	+	508	8	2.38943e+63
ENSOARG00020025151	+	56	7	7.48433e+48
ENSOARG00020024975	+	81	7	5.1501e+55
ENSOARG00020023116	+	142	7	4.39148e+55
ENSOARG00020020521	+	77	7	4.67978e+55
ENSOARG00020012132	+	48	7	1.02072e+62
ENSOARG00020021923	+	160	6	1.27278e+53
ENSOARG00020023464	+	72	6	4.63819e+47
ENSOARG00020010316	+	99	6	1.37634e+47
ENSOARG00020010009	-	38	6	2.57803e+53
ENSOARG00020019417	-	265	6	1.42567e+53
ENSOARG00020015764	+	75	6	2.17202e+53
ENSOARG00020014950	-	53	6	1.53278e+41
ENSOARG00020004443	-	22	6	1.50853e+53
ENSOARG00020024111	-	57	6	2.32945e+53
ENSOARG00020019526	+	936	6	5.40728e+47
ENSOARG00020017657	+	927	6	1.36348e+47
ENSOARG00020009493	+	24	5	3.93457e+39
ENSOARG00020009463	-	171	5	5.53846e+39
ENSOARG00020001839	-	22	5	2.36513e+44
ENSOARG00020013296	-	220	5	1.30213e+44
ENSOARG00020009594	+	27	5	1.80992e+39
ENSOARG00020000574	-	64	5	4.83258e+39
ENSOARG00020022227	-	30	5	2.57221e+39
ENSOARG00020011534	+	32	5	8.99475e+34
ENSOARG00020001746	+	221	5	5.61333e+39
ENSOARG00020008725	-	56	5	1.06341e+44
ENSOARG00020005029	+	18	5	2.47041e+44
ENSOARG00020014833	+	112	5	2.16917e+44
ENSOARG00020021728	-	41	5	9.69431e+39
ENSOARG00020008753	+	48	5	4.79428e+39
ENSOARG00020017441	+	21	5	4.70789e+39
ENSOARG00020017122	-	32	5	3.58463e+39
ENSOARG00020007944	+	33	5	4.616e+39
ENSOARG00020020554	-	316	5	2.85459e+29
ENSOARG00020021460	+	69	5	2.49064e+39
ENSOARG00020018689	+	21	5	1.07402e+44
ENSOARG00020012612	-	55	5	2.30923e+39
ENSOARG00020006059	-	79	5	9.06857e+39
ENSOARG00020016427	+	46	5	1.23996e+44
ENSOARG00020001897	-	14	5	3.14307e+34
ENSOARG00020024656	-	77	5	1.40786e+39
ENSOARG00020013189	-	26	5	3.06215e+39
ENSOARG00020011054	-	18	5	6.9418e+39
ENSOARG00020009591	+	17	5	3.2681e+39
ENSOARG00020001722	-	34	5	1.02553e+44
ENSOARG00020010643	+	49	5	2.57578e+39
ENSOARG00020021309	-	24	5	2.26119e+44
ENSOARG00020022244	-	28	5	1.12502e+44
ENSOARG00020016462	-	95	5	2.90897e+39
ENSOARG00020023268	-	38	5	9.85674e+34
ENSOARG00020016302	+	169	4	1.09751e+35
ENSOARG00020003490	+	36	4	2.80042e+31
ENSOARG00020004518	+	39	4	3.52427e+31
ENSOARG00020006591	-	60	4	5.44082e+31
ENSOARG00020017821	+	307	4	1.06481e+35
ENSOARG00020013445	+	34	4	2.70876e+31
ENSOARG00020017369	+	88	4	3.28425e+31
ENSOARG00020011440	+	234	4	2.49043e+35
ENSOARG00020011139	-	49	4	8.1571e+31
ENSOARG00020003297	-	18	4	9.24012e+31
ENSOARG00020003793	+	95	4	3.76127e+31
ENSOARG00020022517	-	287	4	5.95038e+31
ENSOARG00020007510	+	27	4	2.21856e+35
ENSOARG00020018832	+	67	4	1.72338e+31
ENSOARG00020012873	-	25	4	1.87557e+35
ENSOARG00020010575	+	118	4	1.65012e+27
ENSOARG00020021822	+	124	4	9.0997e+31
ENSOARG00020000157	-	45	4	2.06072e+35
ENSOARG00020012698	+	18	4	2.58482e+35
ENSOARG00020024497	-	35	4	5.10131e+31
ENSOARG00020001369	-	14	4	7.51847e+31
ENSOARG00020000812	-	25	4	5.78255e+31
ENSOARG00020002392	+	74	4	2.72042e+27
ENSOARG00020007883	+	38	4	8.62985e+31
ENSOARG00020011459	+	69	4	7.64309e+31
ENSOARG00020001149	-	18	4	1.80682e+35
ENSOARG00020014346	-	15	4	1.12146e+35
ENSOARG00020020993	-	18	4	6.87821e+31
ENSOARG00020012094	+	90	4	3.73605e+31
ENSOARG00020004400	+	68	4	5.73542e+31
ENSOARG00020014414	+	24	4	1.48167e+31
ENSOARG00020021170	-	33	4	1.47105e+31
ENSOARG00020004238	-	40	4	3.99362e+27
ENSOARG00020020728	-	46	4	2.14082e+31
ENSOARG00020022429	-	28	4	5.93819e+31
ENSOARG00020000536	+	24	4	7.75885e+31
ENSOARG00020018454	-	23	4	1.19647e+35
ENSOARG00020018672	+	48	4	3.17802e+31
ENSOARG00020003406	+	61	4	8.44265e+31
ENSOARG00020026259	+	62	4	3.69253e+31
ENSOARG00020000240	-	74	4	2.20064e+35
ENSOARG00020026416	+	43	4	2.93843e+31
ENSOARG00020010058	+	60	4	2.51471e+35
ENSOARG00020022236	+	128	4	8.44545e+31
ENSOARG00020024426	+	81	4	1.94564e+31
ENSOARG00020010031	-	14	4	4.34629e+31
ENSOARG00020004477	-	69	4	3.7586e+31
ENSOARG00020026472	+	34	4	3.66235e+27
ENSOARG00020004362	+	19	4	1.11873e+35
ENSOARG00020008942	-	19	4	2.10014e+35
ENSOARG00020006631	-	24	4	7.09288e+31
ENSOARG00020025767	+	58	4	3.78702e+31
ENSOARG00020000225	+	31	4	3.49134e+31
ENSOARG00020022204	-	252	4	4.78761e+31
9.231	-	117	4	8.86435e+31
ENSOARG00020010355	+	43	4	2.48561e+35
ENSOARG00020015043	+	24	4	2.91113e+31
X.342	+	87	4	5.77835e+23
ENSOARG00020009823	-	58	4	2.05687e+31
ENSOARG00020016252	-	33	4	5.22621e+31
ENSOARG00020018089	-	83	4	9.01255e+31
ENSOARG00020004174	-	21	4	2.80978e+31
ENSOARG00020014058	-	28	4	5.46342e+31
ENSOARG00020004753	+	38	4	2.5882e+35
ENSOARG00020012046	-	105	4	3.08805e+31
ENSOARG00020001867	+	23	4	1.08195e+35
ENSOARG00020017166	-	1553	4	6.55935e+31
ENSOARG00020005462	+	368	4	5.83607e+31
ENSOARG00020005999	+	14	4	3.31471e+31
ENSOARG00020012288	-	29	4	2.27136e+31
ENSOARG00020005389	+	1225	4	3.25991e+31
ENSOARG00020021723	+	22	4	5.28884e+31
ENSOARG00020024129	+	63	4	1.25167e+31
ENSOARG00020020834	+	31	4	1.91898e+35
ENSOARG00020012168	+	31	4	1.39146e+35
ENSOARG00020016901	-	12	4	1.07309e+35
ENSOARG00020001079	+	67	4	2.51808e+35
ENSOARG00020020798	+	48	4	3.00819e+31
ENSOARG00020021287	+	34	4	6.44972e+31
ENSOARG00020009669	-	41	4	1.06508e+35
ENSOARG00020026244	+	39	4	1.04531e+27
ENSOARG00020003658	-	93	4	8.42e+31
ENSOARG00020024874	+	27	4	8.09125e+27
ENSOARG00020012388	-	41	4	6.75466e+31
ENSOARG00020017550	-	54	4	1.41804e+35
ENSOARG00020009295	-	18	4	2.57945e+31
ENSOARG00020023443	+	11	4	4.82618e+31
ENSOARG00020020966	-	131	4	3.39891e+31
ENSOARG00020005506	+	17	4	1.75347e+35
ENSOARG00020017394	-	87	4	1.30239e+31
ENSOARG00020016052	-	31	4	5.85365e+31
ENSOARG00020024272	+	43	4	1.78036e+31
ENSOARG00020020564	+	35	4	1.698e+31
ENSOARG00020014256	-	110	4	7.92248e+27
ENSOARG00020010826	-	54	4	3.97481e+31
ENSOARG00020005373	+	18	4	5.55406e+31
ENSOARG00020023937	+	81	4	2.80435e+31
ENSOARG00020001840	+	8	3	2.08554e+26
ENSOARG00020000296	+	171	3	1.77915e+23
ENSOARG00020016672	+	48	3	1.59797e+23
ENSOARG00020011058	+	793	3	4.53205e+23
ENSOARG00020007719	-	13	3	2.62917e+26
ENSOARG00020012080	+	21	3	1.87425e+26
ENSOARG00020002723	-	58	3	1.93908e+20
ENSOARG00020010134	-	31	3	2.26562e+26
ENSOARG00020019864	+	47	3	5.89861e+23
ENSOARG00020020301	-	274	3	4.56487e+23
ENSOARG00020021988	-	11	3	6.24935e+23
ENSOARG00020016239	+	47	3	2.96727e+23
ENSOARG00020014934	+	10	3	2.29388e+23
ENSOARG00020009701	-	10	3	5.17531e+23
ENSOARG00020009195	-	8	3	2.04943e+26
ENSOARG00020015741	-	75	3	5.59211e+23
ENSOARG00020006453	+	34	3	3.91232e+23
ENSOARG00020021830	-	45	3	3.97942e+23
ENSOARG00020022912	-	36	3	4.37654e+23
ENSOARG00020023043	+	101	3	4.5657e+20
ENSOARG00020011211	+	49	3	5.42936e+23
ENSOARG00020010686	-	19	3	2.33453e+23
ENSOARG00020026310	+	71	3	1.96488e+20
ENSOARG00020021798	-	19	3	1.9294e+26
ENSOARG00020011140	-	10	3	2.51671e+26
ENSOARG00020004751	-	19	3	1.61593e+23
ENSOARG00020019997	-	34	3	5.88109e+23
ENSOARG00020001308	+	31	3	2.35607e+26
ENSOARG00020001188	-	26	3	1.96049e+26
ENSOARG00020018247	-	27	3	2.93917e+23
ENSOARG00020014646	-	10	3	5.35808e+23
ENSOARG00020015042	-	16	3	8.37638e+23
ENSOARG00020003921	+	29	3	2.39354e+20
2.884	+	18	3	2.56249e+23
ENSOARG00020005112	+	16	3	4.95669e+23
ENSOARG00020021843	-	52	3	6.89332e+23
ENSOARG00020014305	-	33	3	7.81339e+23
ENSOARG00020015996	+	23	3	4.05536e+23
ENSOARG00020000978	-	84	3	5.82538e+23
ENSOARG00020007578	-	24	3	5.42014e+23
ENSOARG00020007803	+	25	3	5.43567e+23
ENSOARG00020013051	+	38	3	1.77996e+23
ENSOARG00020003962	-	244	3	1.05021e+26
ENSOARG00020026292	+	107	3	4.10117e+23
ENSOARG00020015887	+	10	3	8.41922e+23
ENSOARG00020016018	+	97	3	1.12312e+26
ENSOARG00020000976	+	10	3	2.51156e+26
ENSOARG00020020892	+	101	3	5.27335e+23
ENSOARG00020001578	-	11	3	9.54539e+23
ENSOARG00020014355	+	21	3	2.46193e+23
ENSOARG00020015936	-	9	3	1.21162e+26
ENSOARG00020006634	+	20	3	9.14033e+23
ENSOARG00020016266	+	46	3	7.88337e+23
ENSOARG00020009874	-	22	3	3.4069e+23
ENSOARG00020017693	-	44	3	4.2279e+23
ENSOARG00020025957	-	86	3	5.99444e+23
ENSOARG00020015341	+	82	3	2.94931e+23
ENSOARG00020014488	+	1180	3	6.50175e+23
ENSOARG00020008503	-	13	3	2.56776e+26
ENSOARG00020015906	-	9	3	2.07487e+17
ENSOARG00020021964	-	15	3	3.77817e+23
ENSOARG00020017232	+	25	3	5.29852e+23
ENSOARG00020020247	+	25	3	8.07471e+23
ENSOARG00020019681	+	74	3	3.26428e+23
ENSOARG00020010953	+	26	3	4.01327e+23
ENSOARG00020021129	+	71	3	4.3601e+20
ENSOARG00020012208	-	26	3	2.39734e+20
ENSOARG00020014681	+	80	3	5.7227e+23
ENSOARG00020025113	-	24	3	2.677e+23
ENSOARG00020006608	-	19	3	2.51074e+26
ENSOARG00020005403	+	47	3	5.60998e+23
ENSOARG00020023606	-	116	3	6.41327e+23
ENSOARG00020013901	+	460	3	4.17859e+23
ENSOARG00020016461	+	138	3	6.11061e+23
ENSOARG00020021983	+	18	3	4.9625e+23
ENSOARG00020025130	+	17	3	2.6855e+23
ENSOARG00020020566	-	195	3	7.1504e+23
ENSOARG00020022406	-	94	3	3.76836e+23
ENSOARG00020021024	+	64	3	2.55175e+26
ENSOARG00020007526	+	21	3	3.99559e+23
ENSOARG00020007043	-	28	3	3.85863e+23
ENSOARG00020020404	+	15	3	1.9168e+26
ENSOARG00020016769	-	91	3	7.2944e+23
ENSOARG00020017067	-	18	3	2.46238e+23
ENSOARG00020005167	+	12	3	1.39453e+26
ENSOARG00020021520	+	275	3	5.05714e+23
ENSOARG00020001055	+	17	3	1.80668e+26
ENSOARG00020021252	+	12	3	1.23864e+26
ENSOARG00020003936	+	14	3	1.05012e+26
ENSOARG00020002896	+	20	3	2.2439e+20
ENSOARG00020025074	+	67	3	5.49355e+23
ENSOARG00020025689	-	109	3	1.23145e+23
ENSOARG00020014998	-	134	3	5.27537e+17
ENSOARG00020026059	-	28	3	5.1375e+23
ENSOARG00020025460	+	8	3	2.54556e+23
ENSOARG00020009671	+	142	3	2.48305e+26
ENSOARG00020013235	+	20	3	7.05407e+23
ENSOARG00020012269	+	113	3	9.91399e+20
ENSOARG00020026222	-	9	3	2.8409e+23
ENSOARG00020008416	-	17	3	4.83187e+23
ENSOARG00020003226	-	16	3	6.80442e+23
ENSOARG00020022235	+	32	3	4.41779e+23
ENSOARG00020017952	+	36	3	5.30093e+23
ENSOARG00020001005	-	13	3	1.84669e+23
ENSOARG00020018780	+	77	3	2.50284e+26
ENSOARG00020009551	-	92	3	7.05777e+23
ENSOARG00020009659	+	59	3	5.57178e+23
ENSOARG00020003552	-	49	3	7.96046e+20
ENSOARG00020018198	-	43	3	2.92297e+23
ENSOARG00020004282	+	40	3	2.82235e+23
ENSOARG00020010522	+	33	3	3.8389e+23
ENSOARG00020016553	+	13	3	2.98388e+23
ENSOARG00020024301	-	14	3	4.89348e+23
ENSOARG00020021967	+	17	3	8.35436e+23
ENSOARG00020014689	+	519	3	1.75599e+23
ENSOARG00020023994	-	63	3	5.14639e+23
ENSOARG00020023982	-	25	3	5.62697e+23
ENSOARG00020006229	+	48	3	1.08373e+23
ENSOARG00020013809	+	10	3	6.17744e+23
ENSOARG00020002817	-	63	3	1.2741e+26
ENSOARG00020008086	-	35	3	1.21744e+26
ENSOARG00020010739	-	108	3	5.98161e+23
ENSOARG00020012706	-	24	3	1.01673e+23
ENSOARG00020013395	+	60	3	1.53508e+23
ENSOARG00020022383	+	60	3	2.24157e+26
ENSOARG00020012036	+	36	3	7.41062e+23
ENSOARG00020004152	-	7	3	2.50559e+23
ENSOARG00020025449	+	7	3	5.61812e+23
ENSOARG00020009492	-	35	3	3.98385e+23
ENSOARG00020017226	+	13	3	3.73778e+23
ENSOARG00020010604	-	108	3	6.60462e+23
ENSOARG00020011339	-	54	3	5.45605e+23
ENSOARG00020014655	-	7	3	6.86832e+23
ENSOARG00020004720	+	26	3	7.35142e+23
ENSOARG00020007336	-	59	3	4.43823e+23
ENSOARG00020009348	+	39	3	5.48449e+23
ENSOARG00020022447	-	64	3	8.58123e+20
ENSOARG00020025662	+	88	3	4.06069e+23
ENSOARG00020013074	+	22	3	4.58593e+23
ENSOARG00020016784	-	13	3	2.6807e+23
ENSOARG00020006141	-	115	3	2.07171e+26
ENSOARG00020009716	-	91	3	7.5203e+23
ENSOARG00020023429	+	35	3	4.51352e+23
ENSOARG00020024432	+	11	3	2.86736e+23
ENSOARG00020007274	+	24	3	1.69804e+23
ENSOARG00020010635	+	30	3	3.9922e+23
ENSOARG00020010138	-	112	3	1.37916e+26
ENSOARG00020013023	-	26	3	1.06356e+23
ENSOARG00020018452	-	10	3	9.07096e+23
ENSOARG00020013834	-	90	3	4.13578e+23
ENSOARG00020009945	+	25	3	2.64617e+23
ENSOARG00020005704	-	41	3	9.93516e+23
ENSOARG00020014126	+	35	3	1.8491e+23
ENSOARG00020002825	-	80	3	1.48935e+26
ENSOARG00020022575	+	28	3	2.02997e+23
ENSOARG00020025045	-	7	3	1.18922e+23
ENSOARG00020022261	-	539	3	1.97688e+23
ENSOARG00020024447	+	21	3	2.8723e+23
ENSOARG00020012979	+	66	3	2.58614e+26
ENSOARG00020014635	+	9	3	1.41159e+26
ENSOARG00020018609	+	12	3	2.48828e+23
ENSOARG00020001337	-	140	3	1.32043e+26
ENSOARG00020025633	+	14	3	4.05342e+23
ENSOARG00020018597	+	13	3	1.37695e+23
ENSOARG00020010931	-	12	3	1.34005e+23
ENSOARG00020005804	-	56	3	8.98771e+23
ENSOARG00020024819	+	34	3	3.98107e+23
ENSOARG00020017962	-	18	3	5.58138e+23
ENSOARG00020009249	+	182	3	3.98095e+23
ENSOARG00020002080	-	15	3	3.3241e+20
ENSOARG00020026306	-	35	3	1.33706e+20
ENSOARG00020014618	+	55	3	2.84434e+23
ENSOARG00020012987	-	43	3	7.68937e+23
ENSOARG00020019843	-	21	3	2.94375e+23
ENSOARG00020007343	-	42	3	4.80366e+23
ENSOARG00020012432	-	1432	3	2.68528e+23
ENSOARG00020006524	+	10	3	4.4079e+23
ENSOARG00020000122	-	6	3	3.00843e+26
ENSOARG00020010427	+	28	3	7.00477e+23
ENSOARG00020024226	-	9	3	3.53152e+23
ENSOARG00020009790	-	20	3	2.27895e+23
ENSOARG00020001038	+	218	3	1.47025e+26
ENSOARG00020025085	+	1177	3	1.78723e+23
ENSOARG00020002918	+	15	3	2.01488e+26
ENSOARG00020014840	+	117	3	6.87007e+23
ENSOARG00020014779	+	64	3	6.86117e+23
12.303	+	31	3	4.74122e+20
ENSOARG00020026370	-	14	3	4.3407e+23
ENSOARG00020023575	-	22	3	2.47321e+23
ENSOARG00020019274	-	65	3	1.44527e+26
ENSOARG00020022560	-	94	3	5.41375e+23
ENSOARG00020021051	-	15	3	3.64695e+23
ENSOARG00020014432	+	27	3	1.9902e+23
ENSOARG00020018253	-	25	3	4.73144e+23
7.846	+	35	3	9.06546e+23
ENSOARG00020016614	-	15	3	1.26197e+20
ENSOARG00020023922	-	18	3	3.87712e+23
ENSOARG00020021246	-	34	3	3.81673e+23
ENSOARG00020010127	-	65	3	7.73507e+23
ENSOARG00020026238	-	69	3	2.86619e+23
ENSOARG00020024046	+	44	3	2.57402e+23
ENSOARG00020022334	-	25	3	2.02725e+23
ENSOARG00020007811	-	9	3	2.83559e+23
ENSOARG00020000445	-	27	3	1.79615e+23
ENSOARG00020001933	+	21	3	1.74149e+26
ENSOARG00020011384	+	14	3	6.6109e+23
ENSOARG00020012904	+	8	3	4.05604e+23
ENSOARG00020017833	-	96	3	9.51419e+20
ENSOARG00020006875	-	39	3	3.91522e+23
ENSOARG00020020781	+	24	3	8.24484e+23
ENSOARG00020017001	+	37	3	8.641e+23
ENSOARG00020001264	-	8	3	2.18915e+23
ENSOARG00020001204	+	19	3	1.80761e+26
ENSOARG00020009332	+	30	3	4.96361e+23
ENSOARG00020013098	+	46	3	2.42464e+23
ENSOARG00020016169	-	43	3	3.27732e+23
ENSOARG00020006439	+	39	3	1.64895e+26
ENSOARG00020023424	-	12	3	4.63536e+23
ENSOARG00020017546	-	17	3	1.31559e+23
ENSOARG00020022579	-	27	3	1.1274e+26
ENSOARG00020001921	-	82	3	1.25194e+26
ENSOARG00020000653	+	12	3	9.19584e+23
ENSOARG00020003615	-	68	3	8.41425e+23
ENSOARG00020019597	-	16	3	1.03202e+23
ENSOARG00020009730	+	9	3	2.57267e+26
ENSOARG00020014611	+	33	3	1.07811e+23
ENSOARG00020000307	-	182	3	1.46448e+26
ENSOARG00020002845	+	11	3	6.12168e+23
ENSOARG00020021785	-	49	3	1.27864e+26
ENSOARG00020011681	+	21	3	7.54768e+20
ENSOARG00020010532	-	21	3	3.9896e+23
ENSOARG00020011819	-	12	3	5.65895e+23
ENSOARG00020022616	+	31	3	4.80279e+23
ENSOARG00020008343	+	18	3	1.52159e+23
ENSOARG00020015589	-	13	3	3.9965e+23
ENSOARG00020017364	+	13	3	6.27395e+23
ENSOARG00020011332	-	10	3	2.48855e+26
ENSOARG00020015241	-	25	3	1.08347e+23
ENSOARG00020003897	+	33	3	2.59553e+23
ENSOARG00020014015	-	48	3	8.91745e+23
ENSOARG00020002189	-	10	3	2.82459e+26
ENSOARG00020024476	+	179	3	2.33475e+26
ENSOARG00020005026	-	9	3	3.53553e+23
ENSOARG00020003963	+	20	3	8.9242e+23
ENSOARG00020025628	+	42	3	4.04951e+23
ENSOARG00020007924	+	28	3	1.06136e+26
ENSOARG00020015758	+	8	3	2.65369e+26
ENSOARG00020014193	+	185	3	5.90056e+23
ENSOARG00020015834	+	24	3	1.06957e+26
ENSOARG00020020867	-	37	3	1.44603e+23
ENSOARG00020017769	+	8	3	1.41828e+26
ENSOARG00020007303	-	10	3	3.34168e+23
ENSOARG00020018402	-	4454	3	4.23663e+23
ENSOARG00020025240	-	22	3	8.37464e+20
ENSOARG00020026352	-	50	3	2.23919e+20
ENSOARG00020016513	-	17	3	8.93277e+23
ENSOARG00020025852	-	97	3	5.06466e+23
ENSOARG00020006956	-	23	3	3.40167e+23
ENSOARG00020009840	-	36	3	1.09994e+23
ENSOARG00020024896	+	11	3	1.95693e+23
ENSOARG00020021190	+	47	3	4.90182e+23
ENSOARG00020015864	+	15	3	1.48624e+23
ENSOARG00020013704	-	49	3	4.48839e+23
ENSOARG00020012577	-	115	3	1.85072e+23
ENSOARG00020015523	-	28	3	7.54137e+20
ENSOARG00020004605	-	33	3	1.75056e+26
ENSOARG00020004340	+	23	3	8.52952e+23
ENSOARG00020018834	+	35	3	1.2503e+23
ENSOARG00020023958	+	43	3	4.35435e+23
ENSOARG00020022684	+	157	3	4.61115e+23
ENSOARG00020024736	-	12	3	3.0143e+23
ENSOARG00020018275	+	14	3	4.90742e+23
ENSOARG00020025439	-	28	3	2.33466e+26
ENSOARG00020026080	+	21	3	8.17398e+23
ENSOARG00020016608	-	37	3	5.98993e+23
ENSOARG00020021499	+	114	3	3.99065e+23
ENSOARG00020024011	-	171	3	1.66503e+23
ENSOARG00020016250	+	32	3	4.51336e+23
ENSOARG00020000155	-	20	3	4.80123e+23
ENSOARG00020006076	+	9	3	2.87472e+26
ENSOARG00020000397	+	32	3	7.66169e+23
ENSOARG00020016491	-	16	3	2.59747e+23
ENSOARG00020015787	+	15	3	4.59118e+23
ENSOARG00020012335	-	214	3	3.44359e+23
ENSOARG00020005487	-	33	3	1.13167e+26
ENSOARG00020019516	+	35	3	6.99149e+23
ENSOARG00020011530	+	65	3	3.60281e+23
ENSOARG00020023455	+	11	3	6.25764e+23
ENSOARG00020018506	+	14	3	3.0015e+20
ENSOARG00020009407	-	23	3	5.45516e+23
ENSOARG00020011576	+	16	3	5.67546e+23
ENSOARG00020016133	-	8	3	1.87437e+26
ENSOARG00020015772	-	28	3	4.43326e+23
ENSOARG00020022265	-	100	3	9.50355e+23
ENSOARG00020016190	+	55	3	3.20608e+23
ENSOARG00020020991	+	32	3	4.71415e+23
ENSOARG00020001011	+	11	3	6.3422e+23
ENSOARG00020022200	-	85	3	2.02592e+23
ENSOARG00020025577	-	92	3	2.06946e+23
ENSOARG00020016982	-	37	3	2.59694e+26
ENSOARG00020008950	+	126	3	3.11309e+23
ENSOARG00020010955	-	37	3	8.15309e+23
ENSOARG00020017763	+	25	3	5.28153e+23
ENSOARG00020010967	-	60	3	7.60409e+23
ENSOARG00020016591	+	65	3	1.85238e+23
ENSOARG00020011743	+	13	3	1.06705e+26
ENSOARG00020009588	-	22	3	4.92642e+23
ENSOARG00020013965	+	67	3	2.95862e+23
ENSOARG00020026051	-	25	3	1.24752e+23
ENSOARG00020015840	+	74	3	4.59208e+23
ENSOARG00020010630	-	59	3	7.49905e+20
ENSOARG00020010005	-	75	3	3.32863e+23
ENSOARG00020010668	+	528	3	2.54579e+23
ENSOARG00020012697	-	27	3	6.6214e+23
ENSOARG00020025882	-	17	3	3.79196e+23
ENSOARG00020001189	-	22	3	2.18548e+23
ENSOARG00020012414	-	32	3	2.27763e+26
ENSOARG00020026280	+	10	3	1.25693e+20
ENSOARG00020008965	+	20	3	1.99041e+23
ENSOARG00020024897	+	17	3	5.96083e+23
ENSOARG00020012389	-	8	3	9.87414e+23
ENSOARG00020012684	+	53	3	1.85431e+26
ENSOARG00020002698	-	19	3	1.72125e+26
ENSOARG00020014056	+	15	3	1.86358e+26
ENSOARG00020004266	+	29	3	8.50613e+23
ENSOARG00020013883	-	12	3	7.51895e+23
ENSOARG00020025857	-	40	3	6.77196e+23
ENSOARG00020009720	-	379	3	1.36931e+26
ENSOARG00020008081	+	55	3	1.13886e+26
ENSOARG00020006088	+	117	3	6.90247e+23
ENSOARG00020009092	-	22	3	5.59479e+23
ENSOARG00020023535	+	20	3	4.09892e+23
ENSOARG00020002912	+	32	3	3.52386e+23
ENSOARG00020017157	+	12	3	2.17535e+26
ENSOARG00020014741	+	18	3	2.84933e+23
ENSOARG00020012615	-	89	3	3.90789e+23
ENSOARG00020022585	+	56	3	2.0293e+23
ENSOARG00020011479	+	70	3	1.80475e+26
ENSOARG00020002283	+	74	3	7.50796e+20
ENSOARG00020013652	-	16	3	5.53712e+23
ENSOARG00020016182	-	12	3	5.22241e+23
ENSOARG00020022474	+	21	3	3.56317e+23
ENSOARG00020013455	+	55	3	5.81188e+23
ENSOARG00020002973	-	227	3	8.42932e+23
ENSOARG00020017815	+	16	3	1.61833e+26
3.1766	+	33	3	2.19188e+26
ENSOARG00020002878	-	17	3	6.1217e+23
ENSOARG00020014619	+	7	3	4.50603e+23
ENSOARG00020014234	+	56	3	1.64644e+23
ENSOARG00020001935	+	14	2	68464826846784
ENSOARG00020025915	+	6	2	1494002314941490
ENSOARG00020023279	-	41	2	2.24352e+17
ENSOARG00020020360	+	18	2	589803589822
ENSOARG00020010193	+	10	2	7807418978076560
ENSOARG00020024268	-	10	2	7949922779519460
ENSOARG00020021146	-	10	2	3383140133819150
ENSOARG00020004727	+	6	2	9060881790609630
ENSOARG00020006278	-	58	2	5729130757291020
ENSOARG00020010386	+	399	2	2292632422926300
ENSOARG00020005380	+	93	2	1.12927e+17
ENSOARG00020021883	-	8	2	3548940535489730
ENSOARG00020015235	+	18	2	85494158551113
ENSOARG00020022599	-	10	2	8503005485029550
ENSOARG00020019615	+	5	2	4461970744627840
ENSOARG00020003745	+	12	2	3620585836206500
ENSOARG00020013946	+	10	2	1589039815890500
ENSOARG00020010637	-	10	2	1818785118196490
ENSOARG00020010069	+	179	2	7092876670928740
ENSOARG00020023476	+	166	2	4827793648277910
ENSOARG00020006269	+	6	2	72255187225911
ENSOARG00020001270	+	6	2	1.54345e+17
ENSOARG00020008848	+	6	2	82550508257236
ENSOARG00020019206	+	23	2	3249747632498290
ENSOARG00020013935	-	26	2	6290743262907350
ENSOARG00020012172	-	61	2	2.13523e+17
ENSOARG00020020445	-	6	2	8075043580793100
ENSOARG00020023466	+	12	2	2793120927935240
ENSOARG00020014101	+	9	2	2732711227326590
ENSOARG00020022295	+	33	2	2564385425639380
ENSOARG00020006087	-	26	2	5423231754231540
ENSOARG00020019054	-	10	2	7902048179020450
ENSOARG00020017719	-	47	2	6916115869160690
ENSOARG00020019196	-	491	2	2903352429033740
ENSOARG00020014533	+	36	2	2.91614e+17
ENSOARG00020024929	-	25	2	1744539517446460
ENSOARG00020003715	+	9	2	5672853656730840
ENSOARG00020016027	-	19	2	82251688225925
ENSOARG00020011380	-	156	2	5225183652251800
ENSOARG00020026056	-	34	2	2673110926731120
ENSOARG00020002740	-	18	2	1893126818931790
ENSOARG00020013904	-	43	2	92978989297944
ENSOARG00020005522	-	9	2	1.63666e+17
ENSOARG00020014436	-	6	2	2.9156e+17
ENSOARG00020005608	-	42	2	2.86577e+17
ENSOARG00020008012	+	16	2	4667049646669770
ENSOARG00020024732	+	13	2	2841160028411570
ENSOARG00020012385	-	14	2	91328539133079
ENSOARG00020010327	-	7	2	3577188235775210
ENSOARG00020019868	+	10	2	413236413583
ENSOARG00020024802	+	23	2	5454194554544150
ENSOARG00020023089	+	102	2	1.98157e+17
ENSOARG00020019693	+	8	2	4677620946776220
ENSOARG00020006068	+	7	2	1.94422e+17
ENSOARG00020005918	-	10	2	2.2474e+17
ENSOARG00020012777	+	10	2	9394704693948890
ENSOARG00020002574	+	31	2	3344706133447170
ENSOARG00020001435	+	14	2	1.47189e+17
ENSOARG00020013119	+	7	2	8729611387297790
ENSOARG00020012259	+	14	2	36447093644807
ENSOARG00020021227	-	6	2	1.35509e+17
ENSOARG00020024414	+	5	2	70895647089440
ENSOARG00020023901	-	25	2	3195864031958550
ENSOARG00020021181	+	10	2	2690183426906610
ENSOARG00020003934	+	7	2	6873342568755730
ENSOARG00020015231	-	174	2	4655891246558560
ENSOARG00020015660	-	9	2	6354277763542670
ENSOARG00020000880	-	11	2	1.73688e+17
ENSOARG00020019358	+	40	2	1.07531e+17
ENSOARG00020016032	-	6	2	1749603717504500
ENSOARG00020016189	+	9	2	37397903741866
ENSOARG00020009976	+	7	2	4064471540643510
ENSOARG00020009102	+	17	2	3924300539243140
ENSOARG00020018596	-	11	2	7033450170334550
ENSOARG00020014893	-	7	2	7647820376476790
9.12	-	13	2	4750830647508360
ENSOARG00020004787	-	12	2	5658810156588070
ENSOARG00020024361	+	7	2	1405222514052280
12.162	-	6	2	5471214754712180
ENSOARG00020018858	-	123	2	5885836558865550
ENSOARG00020003833	-	28	2	9602698796026220
ENSOARG00020014081	+	9	2	55360465535657
ENSOARG00020020766	-	11	2	4285826742857280
ENSOARG00020016035	-	32	2	8062294080625100
ENSOARG00020014351	+	12	2	7833903478339000
ENSOARG00020000627	-	7	2	2.19139e+17
ENSOARG00020024705	-	5	2	1710823517108250
ENSOARG00020007240	-	365	2	5103766851037690
ENSOARG00020006345	-	25	2	3438893234387810
ENSOARG00020014412	-	53	2	4248409142484760
ENSOARG00020004981	+	79	2	2117248221172450
ENSOARG00020019713	+	541	2	5121864851204490
ENSOARG00020025189	-	15	2	3690844536908560
ENSOARG00020024113	+	6	2	97700639771239
ENSOARG00020015895	-	17	2	4310936243110530
ENSOARG00020007637	-	6	2	2.62859e+17
ENSOARG00020003407	+	20	2	6613702966137820
ENSOARG00020023513	+	28	2	4829636848296380
ENSOARG00020017424	+	9	2	4539829445398450
ENSOARG00020021320	-	196	2	76363997634892
ENSOARG00020016255	+	8	2	5858853458588080
ENSOARG00020014615	-	15	2	2375052223750650
ENSOARG00020017671	-	33	2	1489168514891590
ENSOARG00020008665	-	5	2	4034394340361730
ENSOARG00020026337	-	44	2	2891382528913800
ENSOARG00020018547	-	68	2	97080799705825
ENSOARG00020012946	-	8	2	2531799125318210
ENSOARG00020021909	+	23	2	3934628439345380
ENSOARG00020002714	+	6	2	6707064767070720
ENSOARG00020016369	-	10	2	7885646478856560
ENSOARG00020023041	+	5	2	4667441446674720
ENSOARG00020010094	-	6	2	5141860751420390
ENSOARG00020006282	+	4	2	1.01864e+17
ENSOARG00020024649	+	30	2	4412646644127180
ENSOARG00020017034	-	29	2	4606587446065890
ENSOARG00020011118	+	9	2	6582842565828990
14.253	-	12	2	5501737055017440
ENSOARG00020004375	-	26	2	2732628827326760
ENSOARG00020000309	+	49	2	2.33937e+17
ENSOARG00020017917	-	10	2	1.07436e+17
ENSOARG00020007610	+	27	2	5470355454701830
ENSOARG00020015967	-	50	2	1918432019182560
ENSOARG00020008040	-	179	2	1427099014270750
ENSOARG00020021871	-	66	2	8415790284158100
ENSOARG00020019993	+	5	2	40449514044981
ENSOARG00020023406	+	9	2	1.46104e+17
ENSOARG00020024588	+	9	2	5665744556657110
ENSOARG00020006995	+	41	2	4434683144346850
ENSOARG00020008001	-	5	2	1.03655e+17
ENSOARG00020004604	+	11	2	3779030137791400
ENSOARG00020011728	+	5	2	5632892756329790
ENSOARG00020024756	+	38	2	1.71294e+17
ENSOARG00020005302	+	112	2	2921529229217120
ENSOARG00020019725	+	21	2	2888837728888100
ENSOARG00020004438	-	8	2	3756563637565140
ENSOARG00020005434	-	40	2	4411656544117290
ENSOARG00020025068	-	6	2	6437096664373970
ENSOARG00020025856	+	16	2	5884073658843580
ENSOARG00020022664	+	9	2	2571905425720640
ENSOARG00020008104	-	7	2	1.01396e+17
ENSOARG00020022420	+	13	2	3017456830159180
ENSOARG00020021086	-	7	2	2091802920919530
ENSOARG00020012959	-	23	2	6027065160270610
ENSOARG00020022351	+	27	2	2750018327498960
ENSOARG00020004297	-	17	2	45742664574506
PEKD01006882.1.1	-	10	2	888980
ENSOARG00020009079	-	15	2	2.30813e+17
ENSOARG00020003664	+	14	2	1148090011481990
ENSOARG00020007597	+	27	2	1.6634e+17
ENSOARG00020015221	-	13	2	2.36298e+17
ENSOARG00020000223	+	5	2	7576972375770860
ENSOARG00020023847	-	35	2	2525067825250690
ENSOARG00020013906	-	25	2	4198911141989320
ENSOARG00020002756	+	410	2	6079012760790100
ENSOARG00020021879	+	14	2	4581768745817700
ENSOARG00020020256	+	10	2	3388224533882270
ENSOARG00020018111	-	4	2	4728649047296130
ENSOARG00020008832	+	15	2	9193920991939150
ENSOARG00020008674	-	6	2	41183084118289
ENSOARG00020026173	-	9	2	9782182897821740
ENSOARG00020014623	-	28	2	1730022117300240
ENSOARG00020008336	-	298	2	1.1389e+17
ENSOARG00020004612	-	6	2	2.58778e+17
ENSOARG00020026312	+	18	2	19717531973459
ENSOARG00020019003	+	65	2	4911348149113630
ENSOARG00020018518	+	4	2	95881199588648
ENSOARG00020017586	-	111	2	6149509761496480
ENSOARG00020018425	-	8	2	2843178928431320
ENSOARG00020008870	-	10	2	4792368247923820
ENSOARG00020022759	-	25	2	5297986052978030
ENSOARG00020026470	-	38	2	35616093569559
ENSOARG00020009670	-	36	2	1.09909e+17
ENSOARG00020009689	+	19	2	73869387385813
ENSOARG00020023650	+	8	2	1053842810538360
ENSOARG00020003097	+	26	2	1.75008e+17
ENSOARG00020019871	+	93	2	1527673015276950
ENSOARG00020025979	-	18	2	53127265313214
ENSOARG00020011346	+	17	2	5502005655021210
ENSOARG00020006112	-	6	2	2960906829609210
ENSOARG00020002517	+	6	2	1.9875e+17
ENSOARG00020013312	+	4	2	32049373205672
ENSOARG00020024047	+	14	2	2.00398e+17
ENSOARG00020010186	-	22	2	1.07524e+17
ENSOARG00020014843	-	30	2	8368801383689300
ENSOARG00020012194	+	194	2	4260632842606850
ENSOARG00020012888	-	45	2	3611371336113340
ENSOARG00020002913	-	21	2	1.19212e+17
ENSOARG00020017496	+	15	2	8663738486637260
ENSOARG00020006852	-	33	2	2.87992e+17
ENSOARG00020021608	-	20	2	9482975494834910
ENSOARG00020019592	-	30	2	8304652083046550
ENSOARG00020009004	+	11	2	5660939556609220
ENSOARG00020019261	-	15	2	54604245460994
ENSOARG00020014671	-	24	2	70052907005521
ENSOARG00020019378	+	20	2	5400251154003570
ENSOARG00020011015	-	11	2	4013667240137510
ENSOARG00020024436	+	41	2	2445977324459730
ENSOARG00020019097	+	45	2	2491498324915000
ENSOARG00020008781	-	24	2	2224841722248470
ENSOARG00020023034	+	10	2	2153382721534740
ENSOARG00020006022	-	31	2	1.24884e+17
ENSOARG00020013239	-	18	2	1470395114703980
ENSOARG00020008391	-	18	2	1.42918e+17
ENSOARG00020000196	-	27	2	1.73535e+17
ENSOARG00020006708	+	32	2	3460716234605530
ENSOARG00020024460	-	28	2	5013239150132660
ENSOARG00020014503	-	33	2	78560167856550
ENSOARG00020008724	+	19	2	5559548455604480
ENSOARG00020025448	+	16	2	3775763737756860
ENSOARG00020007441	+	10	2	4287370042873720
ENSOARG00020019328	+	7	2	3472399834723270
ENSOARG00020000701	-	21	2	4501540245015320
ENSOARG00020019165	+	18	2	49925784992146
ENSOARG00020001322	-	12	2	1.10518e+17
ENSOARG00020004922	+	6	2	3749108537492590
ENSOARG00020004276	-	20	2	6804440868052440
16.144	-	9	2	3741240537433640
ENSOARG00020024900	+	22	2	5199050651991640
ENSOARG00020014456	-	5	2	6111211161112740
ENSOARG00020010063	-	90	2	6510544465105470
ENSOARG00020021248	+	97	2	7899596278995930
ENSOARG00020008414	-	7	2	2.69853e+17
ENSOARG00020007779	+	30	2	3924069939240850
ENSOARG00020006611	+	18	2	1.3017e+17
ENSOARG00020014959	+	9	2	2.59067e+17
ENSOARG00020022600	-	114	2	4768177747679890
ENSOARG00020010391	-	13	2	1.25547e+17
ENSOARG00020010657	-	11	2	4485694244869610
ENSOARG00020015809	+	18	2	3887298338858860
ENSOARG00020016253	+	6	2	3897400338975430
ENSOARG00020012058	+	13	2	3430457034305250
ENSOARG00020007317	-	11	2	1084381010843870
ENSOARG00020019151	+	302	2	4812833548128350
ENSOARG00020022384	+	13	2	3131140731311590
ENSOARG00020025961	-	19	2	52556835257731
ENSOARG00020008352	+	7	2	2.56632e+17
ENSOARG00020021310	-	7	2	2510933925109310
ENSOARG00020007711	+	22	2	1.13525e+17
ENSOARG00020020713	-	6	2	8224348182243770
ENSOARG00020011951	+	15	2	5272693152751610
ENSOARG00020000106	-	10	2	2.07846e+17
ENSOARG00020014584	-	19	2	7512416475124240
ENSOARG00020019919	+	19	2	8060967380609360
ENSOARG00020020063	-	30	2	2.96192e+17
ENSOARG00020012426	+	8	2	6601095366011480
ENSOARG00020018302	-	27	2	69792556980113
ENSOARG00020002423	-	346	2	27284412728467
12.182	-	5	2	5563756255662070
ENSOARG00020025144	+	65	2	7969089479690610
ENSOARG00020009273	+	8	2	2229467122294640
ENSOARG00020003523	-	8	2	79573797957889
1.1215	+	5	2	2914847129151280
ENSOARG00020014847	+	8	2	299650296991
ENSOARG00020000149	+	11	2	1.73534e+17
ENSOARG00020004972	+	132	2	1.39302e+17
ENSOARG00020011763	+	8	2	4671485446717550
ENSOARG00020022882	-	4	2	2750669427505690
ENSOARG00020016106	-	17	2	1.2385e+17
ENSOARG00020016783	+	44	2	5107699251076690
ENSOARG00020011721	-	68	2	5226357152263300
ENSOARG00020003276	-	23	2	2356554523565560
ENSOARG00020022019	+	24	2	2730654627306010
ENSOARG00020022558	-	49	2	4044068440440750
ENSOARG00020012726	+	14	2	91673509167377
ENSOARG00020015545	-	12	2	2.74917e+17
ENSOARG00020009700	+	7	2	1.01976e+17
ENSOARG00020014579	-	10	2	10253041025384
ENSOARG00020018234	-	13	2	1081406210827410
ENSOARG00020010359	-	7	2	7567403175673450
ENSOARG00020011832	+	25	2	4548645245486350
ENSOARG00020005767	+	20	2	3298285832982780
ENSOARG00020024532	+	8	2	5352580053525770
ENSOARG00020021740	-	8	2	2735989227364700
ENSOARG00020014182	+	22	2	6188356361912480
ENSOARG00020012402	-	12	2	3901937639016540
ENSOARG00020017500	+	20	2	4216430042164360
ENSOARG00020002814	-	5	2	3185480131855050
ENSOARG00020014920	-	5	2	601503600841
ENSOARG00020016742	+	36	2	1526790215267920
ENSOARG00020016782	+	13	2	3788391437884030
ENSOARG00020018258	-	20	2	2.39723e+17
ENSOARG00020003671	+	6	2	403359405875
ENSOARG00020004445	-	31	2	2350753223503070
ENSOARG00020010024	-	10	2	2981308329813900
ENSOARG00020010419	+	76	2	5206771652067730
ENSOARG00020023129	-	74	2	1.13271e+17
ENSOARG00020014531	+	118	2	3935398639354010
ENSOARG00020015615	-	62	2	7006179570061460
ENSOARG00020004785	+	5	2	2.24546e+17
ENSOARG00020026205	+	111	2	3493005834930150
ENSOARG00020004393	-	33	2	5510188055101710
ENSOARG00020023226	+	13	2	1998200519981560
ENSOARG00020006717	-	12	2	1.30189e+17
ENSOARG00020002335	+	36	2	1.74634e+17
ENSOARG00020015155	-	10	2	5727010357270120
ENSOARG00020005884	+	7	2	6286337562871620
ENSOARG00020021802	+	16	2	6892630168925850
ENSOARG00020000337	+	19	2	9096540490962600
ENSOARG00020018222	-	20	2	6178747661788090
ENSOARG00020017916	+	29	2	4551081945510850
ENSOARG00020004904	+	18	2	1.01077e+17
ENSOARG00020007850	+	9	2	1111825511120140
ENSOARG00020022289	+	12	2	3074653030746550
ENSOARG00020026149	-	10	2	2728477927286050
ENSOARG00020008714	+	1233	2	3962333839623130
ENSOARG00020018294	-	8	2	45654054565521
ENSOARG00020022231	+	81	2	2306848123067980
ENSOARG00020018459	+	12	2	29985322998697
ENSOARG00020019105	-	6	2	5889272958895180
ENSOARG00020017704	-	18	2	5280517952805190
ENSOARG00020000990	-	8	2	57392455739226
ENSOARG00020005120	-	8	2	9284118392852380
ENSOARG00020024591	-	13	2	2.3354e+17
ENSOARG00020012938	-	16	2	7445607774453810
ENSOARG00020008976	-	10	2	8484561984846970
ENSOARG00020019133	-	10	2	2.41127e+17
ENSOARG00020008311	-	19	2	1.01554e+17
ENSOARG00020025776	+	19	2	5042093550420950
ENSOARG00020001924	+	6	2	5854773658503150
ENSOARG00020026326	-	360	2	14770971477120
ENSOARG00020011905	-	17	2	97216039716327
9.283	+	30	2	1482016714821540
ENSOARG00020018505	+	10	2	5848693258486500
ENSOARG00020002678	+	36	2	2.1524e+17
ENSOARG00020020047	-	17	2	5904649459030200
ENSOARG00020010928	-	5	2	4233666042339120
ENSOARG00020018108	+	5	2	2.54357e+17
ENSOARG00020009587	+	6	2	2.26296e+17
ENSOARG00020016612	-	147	2	4541380645413780
ENSOARG00020021842	+	86	2	4305470043054710
ENSOARG00020012059	+	22	2	5230474152304710
ENSOARG00020011202	+	33	2	2355438623554420
ENSOARG00020022328	+	46	2	4593739145929030
ENSOARG00020012369	+	8	2	1.87495e+17
ENSOARG00020025023	+	14	2	1779033117787860
10.46	-	11	2	2157983421579780
ENSOARG00020026195	-	72	2	9870976598709780
ENSOARG00020003016	-	14	2	6621354166213570
ENSOARG00020004320	+	5	2	27816512781719
ENSOARG00020011714	-	9	2	18198931813484
ENSOARG00020015122	-	21	2	4750531647505430
ENSOARG00020011312	-	9	2	1.29413e+17
ENSOARG00020019361	+	23	2	3601026336011090
ENSOARG00020018336	+	109	2	89773098977273
ENSOARG00020006418	+	17	2	3849680038496970
ENSOARG00020020861	-	36	2	3008247230083310
ENSOARG00020019166	-	12	2	4280213942802190
ENSOARG00020005427	-	26	2	1.22784e+17
ENSOARG00020010884	+	5	2	1.0081e+17
ENSOARG00020026122	-	22	2	1.12859e+17
ENSOARG00020006129	+	28	2	1540378215405520
ENSOARG00020003988	-	72	2	8472718084727200
ENSOARG00020006120	+	69	2	2.87486e+17
ENSOARG00020025183	-	29	2	1791293317913470
ENSOARG00020026168	+	9	2	9747559297476960
ENSOARG00020022174	-	4	2	1.12475e+17
ENSOARG00020004026	+	13	2	2732572527325870
ENSOARG00020026397	-	48	2	2922136129221160
ENSOARG00020002246	-	9	2	9388049193882420
ENSOARG00020017659	-	6	2	7429360074294090
ENSOARG00020003196	-	8	2	3797766937977710
ENSOARG00020001970	+	53	2	2.36918e+17
ENSOARG00020025327	-	6	2	2.32864e+17
ENSOARG00020006801	-	7	2	4226819142268030
ENSOARG00020023496	+	11	2	3164953731655540
ENSOARG00020019665	+	70	2	4936232749361590
ENSOARG00020012818	-	5	2	4364904443648950
14.701	+	39	2	5099091250990550
ENSOARG00020026202	-	7	2	2804567628045650
ENSOARG00020009023	-	13	2	6164989961650620
ENSOARG00020022981	+	349	2	5938208459382510
ENSOARG00020025818	-	19	2	5843962858439650
ENSOARG00020024622	+	88	2	4411322544113380
ENSOARG00020000065	+	19	2	229047223563
ENSOARG00020007060	-	11	2	1098471410985720
ENSOARG00020008383	+	20	2	3945523939453330
ENSOARG00020024118	-	38	2	5150151951504630
ENSOARG00020022945	-	9	2	2385821123858260
ENSOARG00020004159	+	7	2	3624284336225570
ENSOARG00020014470	-	30	2	1157530111576140
ENSOARG00020016474	-	23	2	2457924324580700
ENSOARG00020017767	+	10	2	8216951682167970
ENSOARG00020008030	+	9	2	2217071822171520
ENSOARG00020015678	+	15	2	193294196817
ENSOARG00020009147	-	9	2	41589564158987
ENSOARG00020011510	+	94	2	5505050255050470
ENSOARG00020016775	-	91	2	6114805661148660
ENSOARG00020000875	-	14	2	2.34578e+17
ENSOARG00020025236	-	191	2	1206944012069950
ENSOARG00020013322	-	17	2	4178124441781160
ENSOARG00020001061	+	13	2	2.19818e+17
ENSOARG00020017124	-	17	2	3899916638999210
ENSOARG00020010646	-	39	2	3727798337275670
ENSOARG00020009833	+	7	2	5951062259514180
ENSOARG00020004522	-	19	2	6355881663559950
ENSOARG00020021959	+	6	2	5857948158580680
ENSOARG00020026023	-	21	2	8157619681576230
ENSOARG00020016294	+	11	2	5785635657856450
ENSOARG00020009208	+	4	2	5530180955300750
ENSOARG00020003892	+	18	2	49522494952368
ENSOARG00020002160	-	21	2	74607057471814
ENSOARG00020010091	+	7	2	2647366126492130
ENSOARG00020024631	-	25	2	2.33592e+17
ENSOARG00020006239	+	64	2	93251569323857
ENSOARG00020021466	+	4	2	4674884546750800
ENSOARG00020019028	+	80	2	1.27423e+17
ENSOARG00020008113	-	18	2	3925359639253680
ENSOARG00020000820	-	5	2	2947549929471860
ENSOARG00020021932	-	9	2	3935012239376780
ENSOARG00020026132	+	14	2	1.13009e+17
ENSOARG00020018378	-	10	2	1.2666e+17
ENSOARG00020026037	-	59	2	8159297781593350
ENSOARG00020006442	+	29	2	2.40613e+17
ENSOARG00020006860	+	83	2	2.3043e+17
ENSOARG00020024852	-	28	2	3625211336252500
ENSOARG00020008834	-	22	2	5550880855510190
ENSOARG00020010130	-	7	2	4940829949412420
ENSOARG00020020322	+	5	2	3629199936293710
ENSOARG00020020565	-	52	2	2665927926659390
ENSOARG00020001310	+	4	2	1.73801e+17
ENSOARG00020019152	+	8	2	4919999849202850
ENSOARG00020021585	+	42	2	1938569419384830
ENSOARG00020009980	+	12	2	6192316561922820
ENSOARG00020017480	+	58	2	1306826713068040
ENSOARG00020025573	-	83	2	3928939939289410
ENSOARG00020011991	-	7	2	4906434649063580
ENSOARG00020015820	-	7	2	1.32975e+17
ENSOARG00020022758	+	15	2	1145057811449950
ENSOARG00020021162	-	8	2	7928390579283920
ENSOARG00020005091	+	71	2	8246999082469960
ENSOARG00020003422	-	10	2	2.02487e+17
ENSOARG00020000987	-	52	2	2.34908e+17
ENSOARG00020018333	+	10	2	3380061633800300
ENSOARG00020000914	+	9	2	6290061062900090
ENSOARG00020002658	-	19	2	18222511822220
ENSOARG00020011926	-	10	2	8703005487029670
5.631	+	5	2	1255503612555290
ENSOARG00020010315	-	14	2	2991047129853740
16.142	-	8	2	3538048635381150
ENSOARG00020008568	-	12	2	1178666111786770
ENSOARG00020010111	+	56	2	8571145185711990
ENSOARG00020014885	-	50	2	6508191665081550
ENSOARG00020020772	+	10	2	3639487036394880
ENSOARG00020021782	+	17	2	3405015934050310
13.6	+	5	2	6353916363539430
ENSOARG00020017576	-	371	2	1.0761e+17
ENSOARG00020019256	+	51	2	8346488983462020
ENSOARG00020002706	+	8	2	2.84909e+17
ENSOARG00020009801	+	7	2	1099933910998240
ENSOARG00020017826	-	24	2	1414271314143710
ENSOARG00020016000	+	14	2	1.0714e+17
ENSOARG00020004401	-	5	2	1.00703e+17
ENSOARG00020001042	+	4	2	1.10355e+17
ENSOARG00020019482	+	21	2	8350529583503240
ENSOARG00020009711	+	25	2	2924138929241530
ENSOARG00020024169	+	25	2	2.33031e+17
ENSOARG00020002842	+	15	2	1.27664e+17
ENSOARG00020013663	+	16	2	5519246955192820
ENSOARG00020006843	-	64	2	1770525817705280
ENSOARG00020020401	+	14	2	1.91612e+17
ENSOARG00020019299	+	7	2	55519515552056
ENSOARG00020011828	-	7	2	3024087430244860
ENSOARG00020019769	+	35	2	8410618284105500
ENSOARG00020003860	-	45	2	1.04963e+17
ENSOARG00020010040	+	8	2	1102608911027960
ENSOARG00020010548	-	153	2	5734308457342760
ENSOARG00020013762	-	12	2	2.28066e+17
ENSOARG00020005712	-	36	2	3978129839783980
ENSOARG00020026031	-	51	2	2654399526561820
ENSOARG00020016826	-	4	2	1.42041e+17
ENSOARG00020004130	+	14	2	1469477214705940
ENSOARG00020009562	+	37	2	2279057422790400
ENSOARG00020005228	+	12	2	1344913413453040
ENSOARG00020025291	-	13	2	6760763867607450
ENSOARG00020019125	-	21	2	1884630718845080
ENSOARG00020008789	+	141	2	2526275125262130
ENSOARG00020004942	+	7	2	7363174073631760
ENSOARG00020002256	-	9	2	5395194653952080
ENSOARG00020024847	+	28	2	3991064239894600
ENSOARG00020009805	-	32	2	4524531045245030
ENSOARG00020010106	-	18	2	2330193523301570
ENSOARG00020011796	-	106	2	5484214654842270
ENSOARG00020026347	+	61	2	22260242226247
ENSOARG00020009863	-	5	2	1.29085e+17
ENSOARG00020008622	-	17	2	1711715617117120
ENSOARG00020026136	+	4	2	1.13025e+17
ENSOARG00020004293	-	6	2	1320859913221640
ENSOARG00020012549	-	4	2	4552315145528760
ENSOARG00020010922	-	15	2	1502771015033880
ENSOARG00020017327	-	15	2	7031463270315000
ENSOARG00020000826	-	9	2	96913419691209
ENSOARG00020019119	+	12	2	5082364850823590
ENSOARG00020000246	-	30	2	6207497962074940
ENSOARG00020015420	-	6	2	1.8652e+17
ENSOARG00020019770	+	25	2	2936802129367940
ENSOARG00020003246	-	46	2	2675880126758860
ENSOARG00020009929	+	10	2	1572830415739120
ENSOARG00020004157	+	12	2	2586838725869240
ENSOARG00020015632	+	8	2	1745084817450240
ENSOARG00020009205	+	256	2	5939036359390540
ENSOARG00020005232	-	5	2	1.12733e+17
ENSOARG00020010261	-	8	2	6581341865835580
ENSOARG00020022989	+	15	2	2400502224005050
ENSOARG00020010870	+	5	2	4007426440076700
ENSOARG00020017332	+	7	2	4840411748402950
ENSOARG00020006271	+	279	2	2.07724e+17
ENSOARG00020006769	+	8	2	4410866344109980
ENSOARG00020001851	-	32	2	1.24843e+17
ENSOARG00020000529	-	8	2	2.1901e+17
ENSOARG00020024617	+	18	2	1960506119575150
ENSOARG00020023829	-	16	2	2052738520527330
9.289	+	14	2	1498133814981310
ENSOARG00020013178	+	11	2	1578491215787020
ENSOARG00020020261	+	44	2	24213142420981
ENSOARG00020013466	+	19	2	5495245654953600
ENSOARG00020012900	+	74	2	1122221011222230
ENSOARG00020003043	-	51	2	1.15762e+17
ENSOARG00020000907	-	10	2	1.73695e+17
ENSOARG00020006133	+	6	2	9074948590756140
ENSOARG00020007574	-	7	2	80732148074024
ENSOARG00020011331	+	121	2	1111938711145270
ENSOARG00020010718	-	5	2	5332159453319370
ENSOARG00020021742	-	33	2	1.12291e+17
ENSOARG00020004707	-	25	2	1.0091e+17
ENSOARG00020005039	+	10	2	9284116292841180
ENSOARG00020008845	-	9	2	1.35347e+17
ENSOARG00020001974	-	14	2	3595620635954950
ENSOARG00020017230	+	25	2	3633389636334050
ENSOARG00020024260	+	25	2	5154840151548240
ENSOARG00020019275	-	14	2	7095872270959280
ENSOARG00020000276	-	53	2	2.33914e+17
ENSOARG00020016331	+	26	2	1840101818402230
ENSOARG00020012393	+	11	2	4272671742726650
ENSOARG00020019732	+	17	2	1047352910473750
ENSOARG00020000728	-	12	2	9873404998714410
ENSOARG00020013193	+	14	2	4561772445620150
ENSOARG00020014881	-	67	2	4568769145687380
ENSOARG00020019009	+	11	2	2022052220221100
ENSOARG00020017209	+	31	2	3003552230037030
ENSOARG00020002590	+	6	2	2.38939e+17
ENSOARG00020013167	+	6	2	2675396926754400
ENSOARG00020001780	-	34	2	7931718679317020
ENSOARG00020006819	+	73	2	3209230632092470
ENSOARG00020011245	-	15	2	2.22584e+17
ENSOARG00020015623	+	21	2	2311857023116720
ENSOARG00020026307	+	6	2	19511371951923
PEKD01005036.1.1	+	29	2	1825718014
ENSOARG00020009553	-	70	2	3811656638116510
ENSOARG00020016418	+	28	2	2959535429595370
ENSOARG00020018646	+	116	2	4257101942552390
ENSOARG00020026147	-	48	2	17187301718790
ENSOARG00020021467	+	11	2	2.96922e+17
ENSOARG00020003589	+	20	2	2707302827073380
ENSOARG00020013764	-	6	2	4577705945779000
ENSOARG00020010090	+	38	2	3675197836751630
ENSOARG00020017087	+	100	2	2114539021145020
ENSOARG00020003033	+	31	2	6146132461462250
ENSOARG00020005916	+	107	2	4444084344440200
ENSOARG00020019351	+	6	2	2128295921284680
ENSOARG00020023605	+	20	2	2799552927989610
ENSOARG00020006978	-	118	2	2.88047e+17
ENSOARG00020015731	-	57	2	5830266758302620
ENSOARG00020013142	+	13	2	1782528817826460
ENSOARG00020002191	+	77	2	2875564628755690
ENSOARG00020021403	+	133	2	2006505820063950
ENSOARG00020001748	-	16	2	1.0264e+17
ENSOARG00020012688	+	131	2	4770974447709480
ENSOARG00020008285	+	6	2	9165032391650370
ENSOARG00020012227	+	62	2	2.13535e+17
ENSOARG00020002718	-	11	2	1.48901e+17
ENSOARG00020002652	+	175	2	2.15149e+17
ENSOARG00020009121	-	7	2	4080570740806000
ENSOARG00020020286	+	50	2	3624567236245690
ENSOARG00020025513	+	11	2	4492078844920730
ENSOARG00020017101	-	18	2	5872935258729240
ENSOARG00020026378	-	28	2	4346258543463350
ENSOARG00020011002	+	6	2	1509197615087420
ENSOARG00020025670	+	31	2	4073587340734420
PEKD01006998.1.1	+	47	2	1903318797
ENSOARG00020018103	+	12	2	4457248444572860
ENSOARG00020014121	+	7	2	5466732254667430
ENSOARG00020004977	+	6	2	2631117226311110
ENSOARG00020004771	-	10	2	1231980112319430
ENSOARG00020003881	-	40	2	5325419053253470
ENSOARG00020006678	+	8	2	9667300696673230
ENSOARG00020004674	+	7	2	4904436649043950
ENSOARG00020003478	+	9	2	8443842084438860
ENSOARG00020006124	-	64	2	1503192215031900
ENSOARG00020020903	-	11	2	2068093320679620
ENSOARG00020008060	-	11	2	2332961223329210
ENSOARG00020021880	+	22	2	1964021119639670
ENSOARG00020022087	-	14	2	1970950819710470
ENSOARG00020009405	-	23	2	5942633059427010
ENSOARG00020019484	-	5	2	2924163929241680
ENSOARG00020001053	+	14	2	1.10768e+17
ENSOARG00020010443	-	15	2	1.02269e+17
ENSOARG00020022191	-	12	2	5388441253883400
ENSOARG00020000229	+	5	2	7331082373310720
ENSOARG00020004998	-	15	2	3525201435251450
ENSOARG00020005386	-	46	2	1301550413015740
ENSOARG00020014400	+	34	2	3857083238572760
ENSOARG00020018802	-	18	2	4261228242611850
ENSOARG00020008621	+	8	2	1.28174e+17
ENSOARG00020004949	-	24	2	6380244163802460
ENSOARG00020004831	+	24	2	9814010798140030
ENSOARG00020025533	+	7	2	3912139739120320
ENSOARG00020022780	-	4	2	9655715896557420
ENSOARG00020021847	-	28	2	1147618311476680
ENSOARG00020013242	+	32	2	6290214362905280
ENSOARG00020014532	-	33	2	140942158469
ENSOARG00020013543	-	26	2	3920288139203230
ENSOARG00020023923	-	8	2	1.46247e+17
ENSOARG00020023046	-	32	2	4743433847434590
ENSOARG00020012842	-	26	2	91679269168179
ENSOARG00020014065	+	9	2	2802631528027350
ENSOARG00020003610	+	11	2	1.75327e+17
ENSOARG00020006459	+	12	2	3106989231069500
ENSOARG00020013112	+	16	2	1.08182e+17
ENSOARG00020013759	-	9	2	1543425215433510
ENSOARG00020019449	+	58	2	4664432746644490
ENSOARG00020008655	-	28	2	1266986512669950
ENSOARG00020002513	+	491	2	28893072889279
ENSOARG00020002695	+	8	2	19300721930860
ENSOARG00020024482	+	17	2	7626747576267610
ENSOARG00020020478	+	7	2	1395106113951210
ENSOARG00020009634	+	14	2	5491313354913110
ENSOARG00020022973	-	64	2	86477088647982
ENSOARG00020024742	+	5	2	5100849451009760
ENSOARG00020004406	+	15	2	47783114776387
ENSOARG00020004498	+	9	2	4201367842013690
ENSOARG00020026042	+	11	2	1247229712472070
ENSOARG00020019421	+	60	2	1.07553e+17
ENSOARG00020018901	-	9	2	8845219888449660
ENSOARG00020007163	-	7	2	2.3048e+17
ENSOARG00020005811	+	7	2	1348988113490020
ENSOARG00020023992	-	51	2	5418040754179090
ENSOARG00020022293	+	5	2	6499316264993100
ENSOARG00020003776	-	5	2	9033787090358570
ENSOARG00020005239	-	15	2	5682432756825980
ENSOARG00020004601	-	27	2	3887907338890750
ENSOARG00020014307	+	22	2	1815651618156840
ENSOARG00020002447	-	9	2	1.03761e+17
ENSOARG00020008475	-	8	2	3409964934098100
ENSOARG00020000368	-	21	2	1781780417833090
ENSOARG00020007545	+	5	2	9800630898006320
ENSOARG00020000487	-	8	2	1.9495e+17
ENSOARG00020020863	+	8	2	2066885920669280
ENSOARG00020017585	+	7	2	1.88062e+17
ENSOARG00020007318	-	7	2	1.29633e+17
ENSOARG00020000632	+	26	2	96119939610969
ENSOARG00020008341	-	128	2	9166159991660690
ENSOARG00020001452	+	24	2	9308209693053610
ENSOARG00020014777	-	11	2	4600463946004490
ENSOARG00020017397	-	40	2	1301311713013050
ENSOARG00020010577	-	14	2	2640780926407710
ENSOARG00020019671	-	14	2	1358996113590010
ENSOARG00020019666	+	10	2	7904972979051950
ENSOARG00020019042	-	148	2	4278058442779870
ENSOARG00020001313	-	14	2	1.10512e+17
ENSOARG00020001312	+	9	2	3042855230412900
ENSOARG00020010736	-	10	2	6390950663910380
ENSOARG00020011100	+	6	2	3001203930019850
ENSOARG00020001641	-	22	2	5236677652366650
ENSOARG00020006024	-	6	2	2952526829525570
ENSOARG00020014514	+	17	2	8954032089541520
ENSOARG00020001969	+	7	2	1.81972e+17
ENSOARG00020008317	+	5	2	5089481750895660
ENSOARG00020015368	-	11	2	3760604337606740
ENSOARG00020017656	-	6	2	4600803446047750
7.131	-	38	2	3569092135690760
ENSOARG00020012884	+	9	2	8903491089034390
ENSOARG00020012831	-	17	2	4554810145548630
ENSOARG00020018346	+	6	2	1276265012777400
ENSOARG00020013409	-	51	2	2.89632e+17
ENSOARG00020018277	+	80	2	1.42367e+17
ENSOARG00020009965	-	7	2	2592768425964500
ENSOARG00020001262	+	5	2	1.58693e+17
ENSOARG00020002940	+	8	2	3542850035428760
ENSOARG00020022030	+	13	2	4586153345862480
ENSOARG00020020416	-	5	2	1507560415071170
ENSOARG00020003950	+	17	2	1.38049e+17
ENSOARG00020011720	-	6	2	7295400172954820
ENSOARG00020018600	+	10	2	2850149628502360
ENSOARG00020005361	+	9	2	5010343850103770
ENSOARG00020018460	+	8	2	4247952842481310
ENSOARG00020025428	-	189	2	5608996956089750
ENSOARG00020024833	+	14	2	2191935821922620
ENSOARG00020011000	-	144	2	6938428469384820
ENSOARG00020000476	-	11	2	10167571016010
ENSOARG00020019077	-	20	2	1.08394e+17
ENSOARG00020023052	+	21	2	5317283453166950
ENSOARG00020012230	-	32	2	1.39155e+17
ENSOARG00020005322	-	124	2	68732336873178
ENSOARG00020022306	-	7	2	3707402737075870
ENSOARG00020017261	-	6	2	1.42088e+17
ENSOARG00020005571	-	11	2	8205401982055030
ENSOARG00020012021	-	14	2	6001657460017060
ENSOARG00020023297	+	12	2	3847505938476180
ENSOARG00020017446	+	37	2	7535121075353520
ENSOARG00020023783	-	6	2	517322500962
ENSOARG00020012153	+	8	2	4376577643765690
ENSOARG00020004368	+	11	2	28192432819307
ENSOARG00020024275	-	56	2	4892381548924200
ENSOARG00020014831	+	7	2	68695936869614
ENSOARG00020009782	-	6	2	9478273294795360
ENSOARG00020012804	+	5	2	6691407066914240
ENSOARG00020007905	-	16	2	3844779538447350
ENSOARG00020022792	-	9	2	2.24292e+17
ENSOARG00020020204	+	17	2	1381834113818070
ENSOARG00020012887	-	10	2	1559773315595320
ENSOARG00020006305	+	9	2	9078848590788510
ENSOARG00020020823	-	4	2	5421032654209740
1.8	-	7	2	336538362904
ENSOARG00020019153	-	12	2	2.78318e+17
ENSOARG00020025938	+	18	2	4714264547142590
ENSOARG00020004298	-	21	2	1575831315758830
ENSOARG00020005044	-	416	2	2122693021227560
ENSOARG00020020009	+	12	2	2450028224501010
ENSOARG00020026107	+	12	2	1.12717e+17
ENSOARG00020002422	+	7	2	1.69005e+17
ENSOARG00020016689	+	9	2	5370786853707560
ENSOARG00020008076	-	20	2	8467972184681150
ENSOARG00020007964	+	21	2	3849238838493630
ENSOARG00020017435	+	61	2	6902843569028710
ENSOARG00020022532	-	12	2	3017948830177840
6.446	+	11	2	7591793775917990
ENSOARG00020017964	+	14	2	1427346214273620
ENSOARG00020001947	+	8	2	1.47434e+17
ENSOARG00020006668	+	26	2	2586869425868440
ENSOARG00020022767	+	5	2	1434969814370180
ENSOARG00020007900	-	9	2	2.56466e+17
ENSOARG00020009111	-	19	2	1796070117974220
ENSOARG00020008085	-	5	2	7259255472594140
ENSOARG00020022380	+	5	2	3961655539616570
ENSOARG00020010693	+	11	2	6215587462155900
ENSOARG00020019115	+	16	2	2.54681e+17
ENSOARG00020023166	+	12	2	5076452050762020
ENSOARG00020023320	+	14	2	1.37478e+17
ENSOARG00020012821	-	6	2	1853009618528550
ENSOARG00020000415	-	22	2	1786959217869560
ENSOARG00020008729	-	10	2	5230508852306550
ENSOARG00020022768	+	11	2	5936283559363160
ENSOARG00020014704	-	34	2	5208791552088370
ENSOARG00020001599	+	26	2	2.35723e+17
ENSOARG00020016738	+	12	2	1.09892e+17
ENSOARG00020010257	-	56	2	2612063326121430
ENSOARG00020001330	+	10	2	1.10527e+17
ENSOARG00020016524	+	7	2	7802110478021120
ENSOARG00020008653	-	5	2	31802103177891
ENSOARG00020012133	-	9	2	4189230141889830
ENSOARG00020015352	+	6	2	5211266752112680
ENSOARG00020019202	-	8	2	1.88824e+17
23.172	+	6	2	2525576425288010
ENSOARG00020010086	-	11	2	6176161661764090
ENSOARG00020010880	+	32	2	2.35949e+17
ENSOARG00020023063	+	5	2	2864944928650670
ENSOARG00020007704	+	11	2	6454115764542410
ENSOARG00020017627	+	12	2	2391119623919560
ENSOARG00020005788	+	9	2	2.24667e+17
ENSOARG00020006677	+	8	2	1.42735e+17
ENSOARG00020007097	-	13	2	4434726044347310
ENSOARG00020022801	+	13	2	1.28438e+17
ENSOARG00020002978	+	7	2	2281552822815630
22.266	+	4	2	1942774319427170
ENSOARG00020002350	+	9	2	2255851522557300
ENSOARG00020005591	+	7	2	6973878369738430
ENSOARG00020002871	-	35	2	1.61068e+17
ENSOARG00020020287	+	7	2	2455438524554900
ENSOARG00020013787	-	10	2	6476684164766900
ENSOARG00020022028	-	13	2	1.42608e+17
ENSOARG00020016505	+	13	2	1.12381e+17
ENSOARG00020001844	+	6	2	6210100062101600
ENSOARG00020022947	-	5	2	4645400046454140
ENSOARG00020003166	-	99	2	2.21396e+17
ENSOARG00020006583	-	37	2	7061122970612580
ENSOARG00020003214	-	22	2	2016355520168780
ENSOARG00020003308	-	11	2	9956074599558270
ENSOARG00020006144	+	11	2	1.01728e+17
1.1872	+	4	2	2.48069e+17
ENSOARG00020022369	+	15	2	5294170052941650
ENSOARG00020000212	+	8	2	1.19738e+17
ENSOARG00020006151	-	7	2	2966584229664740
ENSOARG00020021501	-	69	2	2.50931e+17
ENSOARG00020010587	-	6	2	2567856425679180
ENSOARG00020025696	-	9	2	4092613840923800
ENSOARG00020017840	-	84	2	3015541630155760
ENSOARG00020020899	-	31	2	5379792653828210
ENSOARG00020021827	-	21	2	4432652644326660
ENSOARG00020010285	+	15	2	3973690339735860
ENSOARG00020007664	+	38	2	9151096291513790
ENSOARG00020016741	+	11	2	85637048562106
ENSOARG00020000416	+	5	2	1.44821e+17
ENSOARG00020013020	-	6	2	3631195436318050
ENSOARG00020001384	-	10	2	9282332192823680
ENSOARG00020018526	-	24	2	70235997023697
ENSOARG00020011878	-	7	2	4814286248143040
ENSOARG00020011401	-	58	2	1.06668e+17
21.3	-	12	2	695061695094
ENSOARG00020002523	+	8	2	2.38595e+17
ENSOARG00020022430	-	10	2	5294778952947640
ENSOARG00020025726	-	13	2	4116436241164380
ENSOARG00020023821	-	10	2	4872870848728870
ENSOARG00020008512	-	8	2	1941247919412360
ENSOARG00020012442	-	4	2	5175711251759310
ENSOARG00020008467	-	16	2	1.35082e+17
ENSOARG00020022840	-	12	2	2307106523071290
ENSOARG00020005839	-	5	2	4368453643695740
ENSOARG00020021071	-	5	2	1.27809e+17
ENSOARG00020017305	+	7	2	7532013575320150
ENSOARG00020017329	+	49	2	16011591601213
22.97	-	7	2	2387399923874140
ENSOARG00020014977	-	21	2	6334679963347040
ENSOARG00020024945	+	6	2	1762573217626970
ENSOARG00020000405	-	13	2	4192178141921940
ENSOARG00020012573	-	15	2	2730066927298420
ENSOARG00020021617	+	7	2	1942448619427330
ENSOARG00020005444	+	10	2	69317276931208
ENSOARG00020011473	+	10	2	4539692945434600
ENSOARG00020010269	-	178	2	2.51517e+17
ENSOARG00020009862	-	57	2	2328970923289870
ENSOARG00020003991	+	36	2	1315775613157060
ENSOARG00020025126	+	15	2	1199848411998680
ENSOARG00020019565	+	9	2	5856838458568120
ENSOARG00020005967	-	8	2	8215442482155340
ENSOARG00020005645	+	43	2	9109064391090680
ENSOARG00020006185	-	17	2	1.30062e+17
ENSOARG00020006951	+	6	2	1.05756e+17
ENSOARG00020008115	+	13	2	2570142725701240
ENSOARG00020005802	+	14	2	2.87062e+17
ENSOARG00020023139	+	23	2	2371743023717590
ENSOARG00020012861	-	7	2	1022347910223400
ENSOARG00020009771	-	5	2	6876357668813230
ENSOARG00020016216	-	12	2	3780656037810670
ENSOARG00020011890	+	5	2	7311753273118980
20.149	-	20	2	2933917629339860
ENSOARG00020003783	+	5	2	2.8635e+17
ENSOARG00020009127	-	32	2	1.42938e+17
ENSOARG00020002974	-	118	2	2.16907e+17
ENSOARG00020003232	+	26	2	5312637853124880
ENSOARG00020010413	-	9	2	3681800436816400
ENSOARG00020012241	-	8	2	6004474660046200
ENSOARG00020022312	-	25	2	3766528137665300
ENSOARG00020021645	+	12	2	2517282025186730
20.134	-	7	2	2724977427250040
ENSOARG00020026133	-	25	2	9646581996465680
ENSOARG00020022142	+	44	2	8542351685422940
ENSOARG00020005741	-	17	2	2.68648e+17
ENSOARG00020019117	-	14	2	52485615249334
ENSOARG00020018081	+	5	2	4648014946480840
ENSOARG00020004092	-	80	2	2.21489e+17
ENSOARG00020006440	+	30	2	4070816740708200
ENSOARG00020008005	+	8	2	2.11784e+17
ENSOARG00020025402	-	16	2	3772743237728960
ENSOARG00020000401	+	83	2	995743995553
ENSOARG00020005346	+	269	2	5606780256067080
ENSOARG00020009726	-	7	2	5949799859497330
ENSOARG00020008682	-	76	2	1947444119474780
ENSOARG00020008685	+	29	2	5468329854681940
ENSOARG00020021551	+	11	2	2011573920115850
ENSOARG00020003131	+	13	2	2088151720880920
ENSOARG00020026348	+	16	2	2893063428930650
ENSOARG00020008359	-	8	2	1848334718485020
ENSOARG00020023951	+	9	2	4983228349832470
ENSOARG00020023840	+	44	2	1483363714833610
ENSOARG00020009245	+	85	2	5940536159405180
ENSOARG00020001360	+	181	2	1353980013539850
ENSOARG00020008157	+	7	2	3868167138684410
ENSOARG00020006553	+	8	2	1351132413511420
ENSOARG00020007701	+	7	2	3841187138413580
ENSOARG00020004378	+	43	2	6348607463486090
ENSOARG00020003212	-	28	2	1.49728e+17
ENSOARG00020012177	-	11	2	2.73398e+17
ENSOARG00020001795	-	5	2	9803705198044540
ENSOARG00020005948	-	9	2	4376672143743250
ENSOARG00020014650	-	6	2	5535069655350770
ENSOARG00020016863	+	12	2	5819205558190200
ENSOARG00020004688	+	14	2	2084836420848310
ENSOARG00020000933	+	17	2	1.1024e+17
ENSOARG00020024278	-	7	2	2756675527569590
ENSOARG00020001696	+	8	2	2.36538e+17
ENSOARG00020013562	+	25	2	1.04633e+17
ENSOARG00020014129	+	25	2	79187557913709
ENSOARG00020008954	+	24	2	82907208282093
ENSOARG00020015215	-	9	2	1.0701e+17
ENSOARG00020019471	+	18	2	3603189436031930
ENSOARG00020006256	-	33	2	1.01742e+17
ENSOARG00020013006	-	25	2	2804789928048730
ENSOARG00020013909	+	8	2	3834580638345170
ENSOARG00020020610	+	11	2	276273276473
ENSOARG00020008451	-	12	2	31118163113141
ENSOARG00020014080	-	12	2	1110267511103020
ENSOARG00020005465	+	13	2	1.75334e+17
ENSOARG00020017174	-	23	2	1867691918675800
ENSOARG00020000316	-	12	2	1.7866e+17
ENSOARG00020023839	+	22	2	1.28857e+17
ENSOARG00020009648	-	9	2	1044727010454940
ENSOARG00020021699	-	57	2	1585402315854040
ENSOARG00020023988	+	19	2	2404997724048460
ENSOARG00020021762	+	8	2	1131248911314480
ENSOARG00020015795	+	6	2	5597342655973480
ENSOARG00020003022	-	7	2	2.21371e+17
ENSOARG00020004669	-	14	2	48681004865914
ENSOARG00020024684	+	101	2	4689208546892060
ENSOARG00020012571	-	14	2	7896090678959760
ENSOARG00020020958	-	74	2	8608494186084800
ENSOARG00020012316	+	9	2	4263088542630950
ENSOARG00020002013	-	42	2	2.02457e+17
ENSOARG00020025596	+	17	2	2546249825462350
ENSOARG00020001307	-	53	2	3568648535686450
ENSOARG00020018738	-	134	2	1.07847e+17
ENSOARG00020024390	-	16	2	8737577387344030
ENSOARG00020025547	-	34	2	3916863839168600
ENSOARG00020010425	-	8	2	7415876974159460
ENSOARG00020025683	+	12	2	5999789759997740
ENSOARG00020019251	+	14	2	1888621618886550
ENSOARG00020011633	-	21	2	59677605968102
ENSOARG00020017578	+	63	2	44384994439282
ENSOARG00020018493	-	17	2	4872701748728230
ENSOARG00020012087	+	31	2	5635297656353780
ENSOARG00020023834	+	18	2	1698725216982890
ENSOARG00020022775	+	7	2	4610932746110070
ENSOARG00020024322	+	5	2	4895816648959210
ENSOARG00020016508	+	228	2	1850701318506850
ENSOARG00020011149	-	6	2	4502049245019430
PEKD01007288.1.1	+	8	2	2013819899
ENSOARG00020010026	-	7	2	3560393735603980
ENSOARG00020003883	+	8	2	2.17749e+17
ENSOARG00020006041	-	12	2	1.82963e+17
ENSOARG00020022194	+	31	2	7198846771988350
ENSOARG00020009675	-	24	2	2.57195e+17
ENSOARG00020019018	+	15	2	8278351082785960
ENSOARG00020021463	+	15	2	1.27858e+17
ENSOARG00020006097	+	7	2	1691100816911060
ENSOARG00020022604	-	7	2	1579425315794230
ENSOARG00020009289	+	493	2	5158419051584160
ENSOARG00020021242	+	6	2	4903690649036980
ENSOARG00020002378	-	8	2	2.09446e+17
ENSOARG00020017758	+	9	2	1.88753e+17
ENSOARG00020003277	-	5	2	2417340924135120
PEKD01005845.1.1	-	104	2	89109143
ENSOARG00020022983	-	10	2	1641187016413210
ENSOARG00020000961	+	43	2	1.10263e+17
ENSOARG00020016351	-	45	2	2934208129342560
ENSOARG00020014784	+	44	2	10209621018691
ENSOARG00020021160	+	35	2	2.55392e+17
ENSOARG00020009930	+	25	2	4551502145515190
ENSOARG00020016141	-	19	2	7020007870198650
ENSOARG00020001732	-	14	2	21200202118672
ENSOARG00020011413	+	20	2	6973807969738710
ENSOARG00020023931	+	40	2	1216938412171380
ENSOARG00020005303	-	8	2	1294809112949360
ENSOARG00020021696	-	5	2	8410193984102060
ENSOARG00020025711	+	34	2	4109688241077940
ENSOARG00020013993	+	4	2	5202274052025480
ENSOARG00020013255	+	10	2	6668729066593800
ENSOARG00020016329	+	10	2	7022359570223380
ENSOARG00020014376	-	12	2	2.8769e+17
ENSOARG00020011980	-	8	2	90836049083585
ENSOARG00020014006	+	26	2	9481646294816380
ENSOARG00020012848	-	122	2	5404774354047450
ENSOARG00020012188	+	12	2	4756120147562380
ENSOARG00020011771	+	9	2	691348691329
ENSOARG00020013636	+	25	2	2845424228454440
ENSOARG00020022073	-	9	2	4587643745874680
ENSOARG00020008250	-	8	2	78212067821558
ENSOARG00020016274	+	9	2	78444867844319
ENSOARG00020001731	-	32	2	6442838064428090
ENSOARG00020019380	+	14	2	3843801938437140
ENSOARG00020020084	+	11	2	4522153245221840
ENSOARG00020014399	+	13	2	1408160614083110
ENSOARG00020019561	+	153	2	5894753758947770
ENSOARG00020001646	+	5	2	1893448618934430
ENSOARG00020011010	+	47	2	4078454140774770
ENSOARG00020015636	+	40	2	4145663241455880
ENSOARG00020007065	+	70	2	5741022457410400
ENSOARG00020022609	+	27	2	2.61444e+17
ENSOARG00020011901	+	34	2	3028850430289430
ENSOARG00020006237	-	111	2	6106983061069650
ENSOARG00020018933	+	12	2	1884162518841670
ENSOARG00020017100	+	14	2	1.37028e+17
ENSOARG00020001479	+	10	2	4821334248213860
ENSOARG00020001741	+	8	2	21963002186662
ENSOARG00020022197	-	21	2	1877098618770960
ENSOARG00020016170	-	19	2	1766651717665030
ENSOARG00020025315	+	11	2	5309985853099880
ENSOARG00020024420	-	11	2	1297811212969030
ENSOARG00020016014	+	8	2	1756743817568550
ENSOARG00020000393	+	7	2	1784439017844560
ENSOARG00020020238	-	48	2	1533307115333090
ENSOARG00020020403	-	28	2	4916473149166350
ENSOARG00020011575	-	127	2	1.17781e+17
ENSOARG00020004349	-	49	2	46598284659809
ENSOARG00020016430	-	62	2	42449304244861
ENSOARG00020003810	-	32	2	3325958733259960
ENSOARG00020013805	+	90	2	2.65065e+17
ENSOARG00020001687	+	6	2	5264238052656910
ENSOARG00020001067	-	40	2	7619745076197200
ENSOARG00020005203	-	7	2	1492053614920630
ENSOARG00020010682	+	6	2	7611550376114000
ENSOARG00020007614	-	9	2	1.0605e+17
ENSOARG00020015692	+	6	2	1476535314765800
ENSOARG00020008378	+	13	2	2863706528637090
ENSOARG00020002537	-	6	2	1.69831e+17
ENSOARG00020018539	+	92	2	5386150353860930
ENSOARG00020009260	+	25	2	1.03349e+17
ENSOARG00020023960	-	91	2	2402828024028300
ENSOARG00020010713	-	10	2	1.29348e+17
ENSOARG00020005933	+	42	2	5411097754111130
ENSOARG00020016111	+	8	2	4515978745160450
ENSOARG00020001951	+	12	2	8195187381951990
ENSOARG00020018193	-	37	2	4607908746077590
ENSOARG00020010563	-	22	2	5314081353141960
ENSOARG00020000881	+	18	2	244811245486
ENSOARG00020004992	+	8	2	2669674926696880
ENSOARG00020016181	-	5	2	1.36717e+17
ENSOARG00020007076	+	6	2	1367636813676670
ENSOARG00020025604	+	43	2	2.35109e+17
ENSOARG00020001979	+	23	2	1.81998e+17
ENSOARG00020019879	-	13	2	2433088924331060
ENSOARG00020003413	+	10	2	79425637942582
ENSOARG00020013220	+	9	2	2767858227677430
ENSOARG00020019001	+	6	2	1258340512583380
ENSOARG00020010877	-	6	2	5620668956205960
ENSOARG00020014107	-	5	2	1674831416748140
ENSOARG00020017090	+	6	2	26429382643426
ENSOARG00020001299	+	43	2	15141271514198
ENSOARG00020011787	-	6	2	1308387413083900
ENSOARG00020011521	-	11	2	4507739145077880
ENSOARG00020017229	-	14	2	1.37102e+17
ENSOARG00020016911	+	7	2	4557063145551800
ENSOARG00020024132	+	6	2	2.33014e+17
ENSOARG00020004044	-	13	2	2.21479e+17
ENSOARG00020015620	+	8	2	2877794828778060
ENSOARG00020014091	+	49	2	3694821736948190
ENSOARG00020019416	-	7	2	1.62456e+17
ENSOARG00020010074	-	8	2	4974874749750230
ENSOARG00020015553	+	10	2	8619624286197480
ENSOARG00020022230	+	16	2	2.44818e+17
ENSOARG00020010858	-	17	2	1.07962e+17
ENSOARG00020010555	+	82	2	3227045532269820
ENSOARG00020012823	-	12	2	60285566027727
ENSOARG00020007113	+	10	2	9179733091798310
ENSOARG00020024546	-	11	2	2.33475e+17
ENSOARG00020024444	-	22	2	1945822319457890
ENSOARG00020004070	+	23	2	5350422453502070
ENSOARG00020013261	+	12	2	5419062154188980
ENSOARG00020018335	+	18	2	2.77602e+17
ENSOARG00020025361	-	13	2	3769586337696690
ENSOARG00020023601	-	10	2	5001451850014750
X.162	-	23	2	6483238164831400
ENSOARG00020003543	-	8	2	4093569840937470
ENSOARG00020014869	+	59	2	4309762643097590
ENSOARG00020012061	+	6	2	1.04048e+17
ENSOARG00020023207	+	5	2	4778870247804440
ENSOARG00020011404	-	14	2	4537392745373720
ENSOARG00020015152	+	8	2	3822455938224580
ENSOARG00020007110	+	8	2	2.62539e+17
ENSOARG00020024718	-	47	2	3615933636157870
ENSOARG00020000452	-	70	2	2.18969e+17
ENSOARG00020023796	-	7	2	9606651896067430
ENSOARG00020019835	-	13	2	6426074864260950
ENSOARG00020023947	+	80	2	1224076412239050
ENSOARG00020013027	-	52	2	1527812815278150
ENSOARG00020022100	+	31	2	8399062483992510
ENSOARG00020014624	+	17	2	8511226185112460
ENSOARG00020009481	-	15	2	6172487661726140
ENSOARG00020024842	+	16	2	8380893983808220
ENSOARG00020009917	-	9	2	1.07457e+17
ENSOARG00020023712	+	146	2	3496055134961390
ENSOARG00020022920	+	7	2	3995565339955860
ENSOARG00020000423	+	22	2	1.94784e+17
ENSOARG00020009078	+	24	2	2227001622270960
ENSOARG00020003456	+	18	2	1131743011317350
ENSOARG00020025810	+	29	2	5843971458439690
ENSOARG00020020927	+	9	2	4320205143202820
ENSOARG00020017395	+	9	2	4701549947014500
ENSOARG00020018176	-	16	2	1.21497e+17
ENSOARG00020021343	+	8	2	3003686430036990
ENSOARG00020014063	-	17	2	1903937719038860
ENSOARG00020019703	-	35	2	1.42594e+17
ENSOARG00020004215	-	19	2	1557228215564900
ENSOARG00020004864	-	47	2	7358489873585230
ENSOARG00020010609	-	5	2	1.38661e+17
ENSOARG00020008639	+	12	2	2.35612e+17
ENSOARG00020018361	+	13	2	2.77721e+17
ENSOARG00020006228	+	63	2	1.83226e+17
ENSOARG00020001706	-	5	2	18863631886978
ENSOARG00020000853	-	8	2	11855731185599
14.1	-	8	2	2471104324709260
ENSOARG00020013748	+	20	2	15450051537308
ENSOARG00020001596	-	21	2	1.74018e+17
ENSOARG00020000116	-	4	2	1.19704e+17
ENSOARG00020016656	+	11	2	6559180565591510
ENSOARG00020011055	-	8	2	1.01013e+17
ENSOARG00020008675	-	7	2	2411068224110740
ENSOARG00020024796	-	19	2	3021187130211940
ENSOARG00020008377	-	45	2	9700447497005140
ENSOARG00020021253	-	7	2	3013802530139950
ENSOARG00020001205	-	15	2	6609842966098170
ENSOARG00020011566	+	195	2	4989619349896030
ENSOARG00020005374	-	89	2	4408418744085730
ENSOARG00020014783	+	6	2	7832015578321460
ENSOARG00020025666	-	72	2	2499977824999100
ENSOARG00020013851	-	39	2	3922401239235880
ENSOARG00020003798	-	10	2	1463899914639020
ENSOARG00020017352	-	13	2	4697724946977670
2.199	-	10	2	5532595655325980
ENSOARG00020010423	-	36	2	3723949037239370
ENSOARG00020020460	-	24	2	2.55065e+17
ENSOARG00020011031	+	32	2	3207365332073760
ENSOARG00020025693	-	5	2	4091317940910750
ENSOARG00020023087	+	42	2	2404966124049610
ENSOARG00020025312	-	12	2	3759300037593120
ENSOARG00020003515	+	10	2	5534163655340940
ENSOARG00020021256	-	10	2	4577144745770990
ENSOARG00020026150	-	73	2	17328261732804
ENSOARG00020021169	+	32	2	3424787234249670
ENSOARG00020012664	-	17	2	6745592567454140
ENSOARG00020000781	+	25	2	4517836145179360
ENSOARG00020012771	+	4	2	1331960013320510
ENSOARG00020011868	-	29	2	4480381644804980
ENSOARG00020024309	-	66	2	1934655819345860
ENSOARG00020011900	-	21	2	3413803634103780
ENSOARG00020023534	-	32	2	3491075834910590
ENSOARG00020003825	-	15	2	580370580192
ENSOARG00020025245	-	105	2	1208510612082710
ENSOARG00020008862	+	19	2	2210434222104270
ENSOARG00020020454	-	92	2	4362047043620400
ENSOARG00020020854	-	19	2	5268022152681250
ENSOARG00020007141	-	5	2	1691331416913290
ENSOARG00020005878	+	56	2	1.01667e+17
PEKD01007121.1.1	-	79	2	1071810956
ENSOARG00020024450	-	20	2	2.33404e+17
ENSOARG00020022997	+	7	2	4062755040609940
ENSOARG00020022016	-	13	2	1.36052e+17
ENSOARG00020022909	-	8	2	4644627846446240
ENSOARG00020024180	+	6	2	1.69515e+17
ENSOARG00020013660	-	20	2	1867556218674590
ENSOARG00020014898	-	6	2	4222113742221100
ENSOARG00020004551	-	173	2	2.24442e+17
ENSOARG00020014162	-	5	2	4833944348338800
ENSOARG00020019329	+	9	2	8349704783476160
ENSOARG00020015667	-	25	2	5955617359560450
ENSOARG00020014173	+	11	2	1810833318106000
ENSOARG00020013746	-	12	2	1954161019540420
ENSOARG00020004449	-	13	2	7321532573217210
ENSOARG00020013410	+	5	2	5444097354442680
ENSOARG00020004080	+	24	2	3814291438144170
ENSOARG00020008556	-	15	2	2556390825545770
ENSOARG00020023270	+	39	2	8526015685260180
ENSOARG00020002737	-	10	2	19730241973572
ENSOARG00020025574	+	14	2	8072945680729430
ENSOARG00020019772	-	7	2	3650456736507720
2.1141	+	4	2	1.23894e+17
ENSOARG00020003617	-	19	2	66047156603710
ENSOARG00020007221	+	27	2	5955584859554820
ENSOARG00020013448	+	15	2	2.89702e+17
ENSOARG00020017808	+	15	2	1062788810627830
ENSOARG00020011023	+	7	2	4233700742337080
ENSOARG00020002172	+	9	2	2.3755e+17
ENSOARG00020014151	+	40	2	5291623152916210
ENSOARG00020024098	+	9	2	1247648512477510
ENSOARG00020001455	-	9	1	220092110
ENSOARG00020024059	-	4	1	53362038
ENSOARG00020007146	-	3	1	61307340
ENSOARG00020000744	+	7	1	109832488
ENSOARG00020009363	+	8	1	59414116
ENSOARG00020018561	+	5	1	48696913
ENSOARG00020021973	+	4	1	18765461
ENSOARG00020021483	-	6	1	42964088
ENSOARG00020026002	-	6	1	26508112
ENSOARG00020012702	+	10	1	11350897
ENSOARG00020014343	+	5	1	6166597
ENSOARG00020007493	+	67	1	230526054
ENSOARG00020021422	+	5	1	112127047
ENSOARG00020009539	+	25	1	289346780
ENSOARG00020003263	+	6	1	175232415
ENSOARG00020017638	+	7	1	58445683
ENSOARG00020002713	-	3	1	116070556
ENSOARG00020021143	-	5	1	30134070
ENSOARG00020010836	+	56	1	52230565
ENSOARG00020020512	+	4	1	26650864
ENSOARG00020018009	-	2	1	45849805
ENSOARG00020004646	-	3	1	100873500
ENSOARG00020001902	-	2	1	98054031
ENSOARG00020017764	+	7	1	480776
ENSOARG00020021443	+	11	1	79370201
ENSOARG00020019973	+	6	1	15466479
ENSOARG00020002025	-	100	1	182039705
ENSOARG00020011290	-	13	1	86831151
ENSOARG00020005778	+	6	1	27690947
ENSOARG00020017344	-	13	1	55059424
ENSOARG00020025397	-	2	1	25406069
ENSOARG00020024573	+	3	1	24931119
ENSOARG00020005308	-	2	1	73834627
ENSOARG00020023889	+	4	1	25296556
2.1172	+	3	1	129737746
1.1206	+	2	1	28381800
ENSOARG00020012965	-	4	1	273514635
ENSOARG00020026189	-	2	1	98562611
ENSOARG00020003542	-	7	1	14565940
ENSOARG00020005456	+	35	1	101575729
ENSOARG00020023870	+	7	1	31958190
ENSOARG00020007395	+	4	1	142812592
ENSOARG00020005394	+	3	1	224632319
ENSOARG00020006288	-	4	1	9548332
ENSOARG00020008733	+	3	1	35238721
ENSOARG00020011269	-	3	1	120660255
ENSOARG00020026277	+	10	1	28815691
ENSOARG00020017370	-	3	1	69008222
ENSOARG00020026226	+	4	1	28489773
ENSOARG00020013567	-	4	1	1508389
ENSOARG00020005782	-	4	1	260934681
ENSOARG00020021176	+	3	1	64378562
ENSOARG00020021568	-	4	1	27316500
ENSOARG00020003823	+	4	1	67250108
ENSOARG00020011597	-	35	1	5958945
ENSOARG00020017025	+	4	1	84915241
ENSOARG00020026314	+	8	1	41258218
ENSOARG00020002298	-	11	1	111325914
ENSOARG00020006830	+	2	1	25373479
ENSOARG00020026392	+	9	1	29221262
ENSOARG00020006371	-	3	1	22028796
ENSOARG00020006629	+	3	1	245003668
ENSOARG00020012863	+	5	1	3932181
ENSOARG00020016619	-	7	1	19186026
ENSOARG00020008585	-	15	1	8182704
ENSOARG00020021145	-	2	1	42900848
ENSOARG00020023098	+	6	1	36810185
ENSOARG00020023805	+	433	1	49712608
ENSOARG00020009415	+	23	1	116793363
ENSOARG00020022360	+	28	1	37682273
ENSOARG00020015789	-	2	1	112225991
ENSOARG00020019961	-	10	1	80611009
ENSOARG00020011198	-	52	1	71037323
ENSOARG00020006751	+	5	1	35429886
ENSOARG00020021660	-	4	1	30488921
ENSOARG00020016777	+	6	1	48030589
ENSOARG00020008324	+	12	1	106281125
ENSOARG00020019454	+	2	1	121985590
ENSOARG00020005220	+	3	1	38221298
22.363	+	2	1	38056988
ENSOARG00020007396	-	3	1	130411820
ENSOARG00020007243	+	9	1	42394665
ENSOARG00020025637	-	11	1	18285580
ENSOARG00020019590	+	4	1	83602914
ENSOARG00020024662	+	5	1	7769743
ENSOARG00020009339	-	5	1	128659182
ENSOARG00020000129	+	34	1	300942466
ENSOARG00020004874	+	16	1	92653632
ENSOARG00020007440	+	8	1	219271758
ENSOARG00020021375	+	32	1	50517146
ENSOARG00020009709	-	4	1	31328528
ENSOARG00020003922	+	16	1	84550148
ENSOARG00020008014	+	4	1	127710315
ENSOARG00020008141	+	4	1	23866059
ENSOARG00020012005	+	2	1	47133989
ENSOARG00020021158	+	2	1	43225241
ENSOARG00020012826	+	13	1	32405431
ENSOARG00020017483	+	3	1	47184132
ENSOARG00020015340	+	3	1	69132288
ENSOARG00020021703	-	6	1	250952109
ENSOARG00020012507	-	7	1	107296628
ENSOARG00020012300	+	5	1	9936590
ENSOARG00020025235	-	3	1	17955115
ENSOARG00020008923	-	6	1	26986647
ENSOARG00020011311	+	18	1	46988394
ENSOARG00020008767	+	3	1	14084558
ENSOARG00020005664	+	11	1	55576356
12.136	-	9	1	47687307
ENSOARG00020001187	+	4	1	121185962
ENSOARG00020002932	-	221	1	2251334
ENSOARG00020011385	+	4	1	13734170
ENSOARG00020008745	-	61	1	240857084
ENSOARG00020005829	-	6	1	8978643
ENSOARG00020011611	-	7	1	64094987
ENSOARG00020005964	+	11	1	287189284
ENSOARG00020026305	+	12	1	28913857
ENSOARG00020023685	+	8	1	64152729
ENSOARG00020019880	-	11	1	46873139
ENSOARG00020017250	-	2	1	39005863
ENSOARG00020024776	+	9	1	39445387
ENSOARG00020003953	+	7	1	30680974
11.742	+	2	1	26099052
ENSOARG00020010920	+	4	1	42205014
ENSOARG00020010602	+	5	1	10921257
ENSOARG00020006468	-	14	1	8428389
ENSOARG00020001357	+	3	1	30558218
ENSOARG00020007293	+	26	1	288650099
ENSOARG00020021799	+	3	1	22076118
ENSOARG00020023033	-	17	1	128618792
ENSOARG00020023789	+	11	1	80730475
ENSOARG00020006815	-	5	1	70764284
ENSOARG00020009445	-	6	1	109898240
ENSOARG00020019829	+	9	1	37638635
ENSOARG00020016546	+	14	1	55984607
ENSOARG00020011316	+	26	1	52250751
ENSOARG00020016700	-	6	1	41395919
ENSOARG00020022335	-	4	1	83232484
ENSOARG00020008809	-	5	1	25629385
ENSOARG00020004346	+	3	1	258010029
ENSOARG00020021358	+	3	1	7368705
ENSOARG00020019307	-	82	1	10172691
ENSOARG00020017912	+	12	1	79626118
ENSOARG00020000300	+	6	1	41815009
ENSOARG00020017579	+	2	1	3928614
ENSOARG00020011356	-	111	1	18907243
ENSOARG00020015733	-	6	1	102510600
ENSOARG00020014536	+	121	1	18213113
ENSOARG00020017073	+	2	1	37904688
ENSOARG00020020165	-	6	1	80232356
ENSOARG00020004496	+	5	1	60441682
ENSOARG00020009394	-	4	1	226045787
ENSOARG00020019708	-	17	1	122170672
18.469	+	2	1	67350421
ENSOARG00020022421	+	2	1	49879565
ENSOARG00020023557	-	40	1	48298395
ENSOARG00020023699	-	6	1	31101068
ENSOARG00020016627	-	11	1	54648397
ENSOARG00020020421	-	3	1	54147516
5.15	-	2	1	14956360
ENSOARG00020015979	+	5	1	53325564
ENSOARG00020002040	-	9	1	208941255
ENSOARG00020010272	-	3	1	100714335
ENSOARG00020008438	+	4	1	39373682
ENSOARG00020025753	-	5	1	11081301
ENSOARG00020022696	+	5	1	19928923
ENSOARG00020026447	+	20	1	2924158
ENSOARG00020015655	+	14	1	80489531
ENSOARG00020004361	-	17	1	221520759
ENSOARG00020009690	-	11	1	56103095
ENSOARG00020005720	-	4	1	27380659
ENSOARG00020007179	+	20	1	235225308
ENSOARG00020020949	-	5	1	18533005
ENSOARG00020009735	+	7	1	25567474
ENSOARG00020017786	+	6	1	260502153
ENSOARG00020006616	+	4	1	17426796
ENSOARG00020009633	+	10	1	109908532
ENSOARG00020004052	+	9	1	24214379
ENSOARG00020000884	-	19	1	110205088
ENSOARG00020002824	-	7	1	285455199
ENSOARG00020000833	-	4	1	92476470
ENSOARG00020023576	-	2	1	23773263
ENSOARG00020001829	+	5	1	147328556
ENSOARG00020016839	+	2	1	42552659
ENSOARG00020011454	+	2	1	70391459
ENSOARG00020003476	-	385	1	14532534
ENSOARG00020025249	+	26	1	8894290
ENSOARG00020011645	-	4	1	637484
ENSOARG00020015363	+	12	1	10859601
ENSOARG00020024211	+	2	1	233206546
ENSOARG00020023300	+	5	1	46214068
ENSOARG00020021017	+	5	1	24810098
ENSOARG00020004970	-	5	1	92812259
ENSOARG00020011096	-	3	1	21054983
ENSOARG00020013915	+	12	1	252255652
ENSOARG00020009575	+	27	1	54902524
ENSOARG00020015627	-	20	1	57923947
ENSOARG00020011392	+	8	1	43566212
ENSOARG00020014448	-	2	1	46971348
ENSOARG00020005472	+	40	1	50151928
ENSOARG00020001009	-	10	1	120577432
ENSOARG00020011516	-	29	1	52645174
16.24	+	2	1	209781
ENSOARG00020011620	+	3	1	249137626
ENSOARG00020010385	-	22	1	59738946
ENSOARG00020008751	-	4	1	230729874
ENSOARG00020025860	-	7	1	37869928
ENSOARG00020005621	+	8	1	7024599
ENSOARG00020017904	-	8	1	168466578
ENSOARG00020019738	+	4	1	83710129
ENSOARG00020021430	-	7	1	71738760
ENSOARG00020011180	+	5	1	231183874
ENSOARG00020021395	+	7	1	255440555
ENSOARG00020009357	-	20	1	18994924
ENSOARG00020001394	+	5	1	102092415
ENSOARG00020012338	-	13	1	74114951
ENSOARG00020022460	+	4	1	255853928
ENSOARG00020020845	+	33	1	82606147
ENSOARG00020012187	+	3	1	45737974
ENSOARG00020007236	-	4	1	105788048
ENSOARG00020003257	+	5	1	27990246
ENSOARG00020004690	-	11	1	26071272
ENSOARG00020001256	+	7	1	173768389
ENSOARG00020021730	+	6	1	82603484
ENSOARG00020017196	-	11	1	36621189
ENSOARG00020018292	+	7	1	46092890
ENSOARG00020025261	-	3	1	17962366
ENSOARG00020021950	+	3	1	45562777
ENSOARG00020023275	-	8	1	47676403
ENSOARG00020022055	+	3	1	45692586
ENSOARG00020018066	-	5	1	78160749
ENSOARG00020002229	+	4	1	82106305
ENSOARG00020020731	-	2	1	38098525
ENSOARG00020020583	-	35	1	45266477
ENSOARG00020018153	-	9	1	30293670
ENSOARG00020010160	-	263	1	122313186
14.347	-	6	1	63850055
ENSOARG00020024905	+	2	1	89365201
ENSOARG00020021566	-	2	1	49246879
ENSOARG00020006765	-	9	1	5409141
ENSOARG00020018512	-	67	1	36413900
ENSOARG00020006940	+	9	1	18765420
ENSOARG00020013786	+	29	1	29417600
ENSOARG00020008163	-	7	1	235449080
ENSOARG00020010128	+	66	1	59709504
ENSOARG00020012522	-	7	1	27288173
ENSOARG00020019947	-	16	1	58791477
ENSOARG00020006859	+	3	1	44341822
11.535	+	3	1	8078437
13.657	+	2	1	70166666
ENSOARG00020017271	-	59	1	112460009
ENSOARG00020021281	+	44	1	17117021
ENSOARG00020000467	+	2	1	110362144
ENSOARG00020015234	-	4	1	34030172
ENSOARG00020025837	-	5	1	50607426
ENSOARG00020022358	-	42	1	255796031
ENSOARG00020018307	-	18	1	53079054
ENSOARG00020017365	+	2	1	21163344
ENSOARG00020024895	-	105	1	89309292
ENSOARG00020010445	-	7	1	65583472
ENSOARG00020024469	-	6	1	19462539
ENSOARG00020022829	-	4	1	82673294
ENSOARG00020005540	-	16	1	14961966
ENSOARG00020020230	+	5	1	49195482
ENSOARG00020013544	+	49	1	66710696
ENSOARG00020015802	-	2	1	57215945
ENSOARG00020013858	-	4	1	78107620
ENSOARG00020013418	+	25	1	11455495
ENSOARG00020023177	-	25	1	18037225
ENSOARG00020016395	-	16	1	217227234
ENSOARG00020019132	-	8	1	58497064
18.459	+	2	1	65914007
ENSOARG00020015134	+	15	1	28651529
ENSOARG00020014566	+	14	1	39366272
ENSOARG00020007033	+	8	1	25994939
ENSOARG00020007538	+	13	1	219440985
ENSOARG00020023592	+	6	1	11634826
ENSOARG00020009011	-	19	1	48005337
ENSOARG00020011250	-	36	1	111586930
ENSOARG00020005785	-	27	1	55595949
ENSOARG00020000264	-	92	1	913653
ENSOARG00020005688	-	4	1	60942356
ENSOARG00020026266	+	4	1	1167448
ENSOARG00020004834	-	4	1	63736500
ENSOARG00020017886	-	4	1	9235759
ENSOARG00020019569	+	9	1	14729049
ENSOARG00020015348	+	3	1	34594774
ENSOARG00020020570	+	4	1	30257197
ENSOARG00020019837	+	12	1	19410036
ENSOARG00020017898	+	54	1	48917072
ENSOARG00020025072	+	3	1	22091341
ENSOARG00020006870	+	109	1	287668912
ENSOARG00020023048	-	8	1	46176025
ENSOARG00020005181	-	11	1	55510083
ENSOARG00020013681	+	6	1	52379872
ENSOARG00020012837	+	3	1	104305176
ENSOARG00020011159	-	19	1	52232779
ENSOARG00020016134	-	149	1	23485650
ENSOARG00020004706	-	14	1	43298122
ENSOARG00020012645	-	5	1	34791559
ENSOARG00020025880	+	5	1	67951194
ENSOARG00020014952	+	2	1	53852108
ENSOARG00020005359	-	5	1	260275285
ENSOARG00020022851	+	5	1	128456636
ENSOARG00020005546	-	7	1	27161348
ENSOARG00020003157	+	5	1	20893078
ENSOARG00020015361	-	5	1	29858026
ENSOARG00020006431	+	24	1	54032078
ENSOARG00020006389	-	15	1	96632969
ENSOARG00020010878	-	5	1	257988383
ENSOARG00020010295	-	15	1	30101555
ENSOARG00020024135	-	18	1	43562190
ENSOARG00020001863	-	7	1	208666590
ENSOARG00020020935	-	17	1	39163491
ENSOARG00020019823	-	3	1	122386937
ENSOARG00020014595	+	6	1	7919237
ENSOARG00020016112	+	2	1	73099475
ENSOARG00020019017	-	5	1	254653809
ENSOARG00020006142	-	2	1	56312367
ENSOARG00020011999	+	2	1	213514472
ENSOARG00020006413	+	3	1	63592070
ENSOARG00020014725	+	5	1	39490384
ENSOARG00020018431	-	30	1	9507827
ENSOARG00020017060	+	104	1	23145934
16.331	+	3	1	33931130
ENSOARG00020017521	-	5	1	55075016
ENSOARG00020000343	-	6	1	75467878
ENSOARG00020021631	+	9	1	88653957
ENSOARG00020025930	-	6	1	26418794
ENSOARG00020020489	-	23	1	29467910
ENSOARG00020016906	-	3	1	58370345
ENSOARG00020003583	-	102	1	20460147
ENSOARG00020024209	+	4	1	43895313
ENSOARG00020007539	+	11	1	13760873
ENSOARG00020022168	+	6	1	27483245
ENSOARG00020018653	-	15	1	19743351
ENSOARG00020005943	+	3	1	22868487
ENSOARG00020014110	+	16	1	47306468
[truncated: 3,792 more rows]
