# Supplementary material for: Integrative analysis of Iso-Seq and RNA-seq data reveals transcriptome complexity and differentially expressed transcripts in sheep tail fat
Source: PeerJ. 2021 Nov 3;9:e12454. doi: 10.7717/peerj.12454 (PMC8571958; doi:10.7717/peerj.12454)
Supplement: Supplemental Information 6 [file peerj-09-12454-s006.xlsx]

## Sheet: BCA-vs-GUA.total.DEG
Transcript ID	Gene	Transcript Biotype	logFC	P value	FDR
X.341.7	ENSOARG00020021235	LncRNA	-23.5874	7.91212e-11	9.29678e-08
ENSOART00020036299	ENSOARG00020023310	lncRNA	-9.15181	0.000337824	0.0432544
ENSOART00020035264	ENSOARG00020022692	lncRNA	6.81546	8.83584e-05	0.013953
ENSOART00020034733	ENSOARG00020021852	lncRNA	-8.05366	3.12214e-05	0.0053461
ENSOART00020033641	ENSOARG00020021748	lncRNA	-23.5228	8.28316e-11	9.29678e-08
ENSOART00020025972	ENSOARG00020015727	lncRNA	-2.17159	0.000284895	0.0378411
ENSOART00020024562	ENSOARG00020015807	lncRNA	-23.9716	4.07934e-11	5.94632e-08
ENSOART00020024241	ENSOARG00020015686	lncRNA	-4.12903	0.000393224	0.0485965
ENSOART00020021713	ENSOARG00020014108	lncRNA	21.3214	6.30283e-09	1.95798e-06
ENSOART00020017168	ENSOARG00020010730	LncRNA	23.6358	8.05242e-11	9.29678e-08
ENSOART00020017088	ENSOARG00020010730	lncRNA	12.3498	3.67342e-16	3.66318e-12
ENSOART00020007757	ENSOARG00020005058	lncRNA	-22.2675	1.39375e-09	6.65828e-07
ENSOART00020006729	ENSOARG00020004408	lncRNA	-4.77737	2.65658e-06	0.000528056
ENSOART00020003848	ENSOARG00020002499	lncRNA	-6.81	6.09873e-05	0.0099059
9.53.1	9.53	lncRNA (Predicted)	-23.7815	5.43044e-11	7.52964e-08
4.18.1	TFPI2	lncRNA (Predicted)	-23.0244	2.25137e-10	1.76534e-07
22.52.1	22.52	lncRNA (Predicted)	-2.98373	0.000201341	0.0282619
2.371.1	CTSB	lncRNA (Predicted)	-23.5366	8.62246e-11	9.42651e-08
14.746.1	LIPE	lncRNA (Predicted)	-27.0587	2.18658e-12	6.21525e-09
11.909.5	TRARG1	lncRNA (Predicted)	-21.422	1.89505e-08	4.58432e-06
1.532.1	TAGLN2	lncRNA (Predicted)	-22.7792	3.89891e-10	2.77061e-07
X.620.11	CHRDL1	Protein coding	-22.3398	1.14541e-09	5.81387e-07
X.403.5	DDX3X	Protein coding	-24.9396	1.32244e-11	2.27816e-08
X.360.3	ThymB4X	Protein coding	-9.83695	2.18082e-06	0.000435008
ENSOART00020041637	CREBBP	Protein coding	-22.5552	6.33559e-10	3.88131e-07
ENSOART00020041534	ENSOARG00020026390	Protein coding	7.1259	1.56458e-06	0.000315407
ENSOART00020041450	WAPL	Protein coding	7.68178	0.000122674	0.0183524
ENSOART00020041448	FLII	Protein coding	-25.0534	1.17701e-11	2.17841e-08
ENSOART00020041445	FLII	Protein coding	-22.5658	6.35711e-10	3.88131e-07
ENSOART00020040904	FASN	Protein coding	21.1029	1.51297e-08	3.96362e-06
ENSOART00020040808	RABEP2	Protein coding	-22.0618	2.34349e-09	9.654e-07
ENSOART00020040605	PPARG	Protein coding	-25.1527	1.06635e-11	2.16503e-08
ENSOART00020040553	DNAH1	Protein coding	-3.18015	0.000291515	0.0385404
ENSOART00020040508	TTPA	Protein coding	-2.64233	0.00023963	0.0326684
ENSOART00020040475	DOCK7	Protein coding	-21.362	9.74129e-09	2.79688e-06
ENSOART00020040459	RELCH	Protein coding	6.49261	0.000321911	0.0417543
ENSOART00020040040	ARHGAP17	Protein coding	8.48245	0.000312349	0.04082
ENSOART00020040007	ENSOARG00020025492	Protein coding	-8.30409	7.4102e-07	0.000153186
ENSOART00020039838	SMARCAL1	Protein coding	21.8138	1.67163e-09	7.60244e-07
ENSOART00020039407	LTF	Protein coding	4.50942	1.31366e-05	0.00234844
ENSOART00020039378	SCAF8	Protein coding	-20.9386	4.03895e-08	9.07551e-06
ENSOART00020039107	FN1	Protein coding	11.0114	2.12955e-05	0.00372501
ENSOART00020038957	KIAA1217	Protein coding	-6.31137	0.000405913	0.0497322
ENSOART00020038921	MYL3	Protein coding	7.23993	2.47362e-05	0.00427457
ENSOART00020038884	ENSOARG00020024830	Protein coding	4.49242	0.000273248	0.0366366
ENSOART00020037652	AMOTL1	Protein coding	21.2481	1.05813e-08	2.98546e-06
ENSOART00020037589	VEGFA	Protein coding	-2.93599	6.43244e-05	0.0103886
ENSOART00020037575	ACACA	Protein coding	-11.2089	2.29616e-05	0.00400412
ENSOART00020037081	SESN3	Protein coding	-21.9135	3.10723e-09	1.18552e-06
ENSOART00020036696	DST	Protein coding	-21.3981	1.81533e-08	4.42918e-06
ENSOART00020036626	XPO7	Protein coding	21.9876	1.51661e-09	7.00957e-07
ENSOART00020036303	DMTN	Protein coding	7.55584	1.45114e-05	0.00256996
ENSOART00020036207	CEP350	Protein coding	20.7369	4.82953e-08	1.0683e-05
ENSOART00020036141	SCTR	Protein coding	6.70482	0.00037002	0.0462583
ENSOART00020035972	ANO10	Protein coding	-23.5561	8.34026e-11	9.29678e-08
ENSOART00020035890	OPA1	Protein coding	-8.88568	2.10049e-09	8.91127e-07
ENSOART00020035633	OPA1	Protein coding	22.0589	1.19194e-09	5.93914e-07
ENSOART00020035545	BCL7C	Protein coding	-5.18288	1.26894e-05	0.00228285
ENSOART00020035292	ENSOARG00020022450	Protein coding	21.1237	1.52622e-08	3.98e-06
ENSOART00020035285	TCF12	Protein coding	7.29584	9.78361e-05	0.0151964
ENSOART00020034611	ENSOARG00020022244(hydroxysteroid 17-beta dehydrogenase 11)	Protein coding	5.30012	8.91041e-05	0.0139968
ENSOART00020034576	CYCS	Protein coding	-7.58911	1.26354e-05	0.00228035
ENSOART00020033617	EDIL3	Protein coding	-3.51345	0.000332466	0.0426644
ENSOART00020033450	ENSOARG00020021633(immunoglobulin binding protein 1)	Protein coding	21.8997	1.86671e-09	8.22641e-07
ENSOART00020033210	VCAN	Protein coding	-9.12605	0.000353132	0.0446698
ENSOART00020032780	ENSOARG00020021233(phosphatidylethanolamine binding protein 1)	Protein coding	-10.9211	1.1057e-15	7.85722e-12
ENSOART00020032538	DHX16	Protein coding	21.2337	1.10177e-08	3.07032e-06
ENSOART00020032396	MITF	Protein coding	-23.7904	6.70958e-11	8.29201e-08
ENSOART00020032175	ECD	Protein coding	-21.9418	3.55685e-09	1.33028e-06
ENSOART00020031989	PLXNA2	Protein coding	-20.3015	5.84336e-08	1.28755e-05
ENSOART00020031685	ENSOARG00020010668(Liver carboxylesterase-like)	Protein coding	20.9626	2.33705e-08	5.46745e-06
ENSOART00020031197	KIAA1522	Protein coding	8.12483	4.19744e-06	0.000814404
ENSOART00020030897	SESTD1	Protein coding	-21.8073	5.36114e-09	1.75158e-06
ENSOART00020030293	ENSOARG00020019406(Nuclear factor I C)	Protein coding	-21.906	3.75757e-09	1.33539e-06
ENSOART00020030069	ATP23	Protein coding	-9.48982	0.000220614	0.0305151
ENSOART00020029639	AIFM1	Protein coding	-21.8073	5.36114e-09	1.75158e-06
ENSOART00020029442	HEATR1	Protein coding	-22.0219	2.80185e-09	1.09097e-06
ENSOART00020029343	LRPAP1	Protein coding	-12.7914	1.77006e-19	3.3542e-15
ENSOART00020029230	ENSOARG00020018964	Protein coding	-7.88336	1.15307e-07	2.49242e-05
ENSOART00020028946	AK2	Protein coding	7.57626	7.41928e-05	0.0118811
ENSOART00020028615	SVIL	Protein coding	-21.9545	2.9476e-09	1.13992e-06
ENSOART00020028519	UTP14A	Protein coding	-21.4372	1.79866e-08	4.42918e-06
ENSOART00020028104	STK10	Protein coding	22.0135	1.43059e-09	6.72128e-07
ENSOART00020027724	PDE1A	Protein coding	-22.1106	2.04118e-09	8.72474e-07
ENSOART00020027681	MED23	Protein coding	21.0451	1.45869e-08	3.85936e-06
ENSOART00020027615	COL1A2	Protein coding	21.9422	1.22966e-09	6.0263e-07
ENSOART00020027532	TMEM132E	Protein coding	2.31728	0.000120457	0.0180682
ENSOART00020027508	WHRN	Protein coding	7.05854	0.000245477	0.0333855
ENSOART00020027441	ENSOARG00020017649(F-box and WD repeat domain containing 11)	Protein coding	-7.2277	0.000157799	0.023061
ENSOART00020027085	PPP1R13B	Protein coding	7.37186	7.02759e-06	0.00131852
ENSOART00020027015	CLSTN1	Protein coding	-22.0128	2.49911e-09	1.0148e-06
ENSOART00020026457	SEPTIN9	Protein coding	22.4263	1.21032e-13	5.73379e-10
ENSOART00020025899	RANBP17	Protein coding	-6.9299	2.47381e-05	0.00427457
ENSOART00020025814	NUMA1	Protein coding	10.6369	4.62213e-05	0.00772833
ENSOART00020025614	ENSOARG00020016687	Protein coding	-2.29503	0.000169974	0.0244629
ENSOART00020025459	TTC3	Protein coding	-9.41507	2.07486e-08	4.91473e-06
ENSOART00020025346	AXL	Protein coding	-9.57208	0.000192262	0.0271213
ENSOART00020025336	CSNK1A1	Protein coding	21.5517	4.19841e-09	1.4378e-06
ENSOART00020025230	SSH2	Protein coding	-21.6753	7.14434e-09	2.18359e-06
ENSOART00020025118	ENSOARG00020016268(Cytochrome P450 2B4-like)	Protein coding	-9.42686	0.000252068	0.0341186
ENSOART00020024711	RPS15	Protein coding	-7.86005	8.68298e-07	0.000178202
ENSOART00020024574	CHRDL1	Protein coding	10.4162	7.22559e-05	0.0116365
ENSOART00020023975	KIF1B	Protein coding	21.2074	1.19116e-08	3.24002e-06
ENSOART00020023693	NPRL3	Protein coding	4.48973	0.00032317	0.0417543
ENSOART00020023619	BAG6	Protein coding	-22.0306	2.72812e-09	1.07702e-06
ENSOART00020023574	OBSL1	Protein coding	-21.7375	6.68411e-09	2.05397e-06
ENSOART00020023180	GPANK1	Protein coding	-21.4471	1.72196e-08	4.31241e-06
ENSOART00020022666	RETREG1	Protein coding	20.8305	2.87166e-08	6.5827e-06
ENSOART00020022499	SLC4A2	Protein coding	-20.9099	4.09396e-08	9.16289e-06
ENSOART00020022280	DDX5	Protein coding	-22.5552	6.33559e-10	3.88131e-07
ENSOART00020022154	VEZT	Protein coding	-21.5595	1.0425e-08	2.96326e-06
ENSOART00020021994	MYO10	Protein coding	20.7369	4.82953e-08	1.0683e-05
ENSOART00020021850	NAA15	Protein coding	-21.8202	5.1607e-09	1.71568e-06
ENSOART00020021692	CYCS	Protein coding	-7.58911	1.26354e-05	0.00228035
ENSOART00020021670	EEF1B2	Protein coding	-9.29697	1.01925e-23	5.79435e-19
ENSOART00020021322	BRD8	Protein coding	-5.0164	0.000165579	0.0240128
ENSOART00020021237	ENSOARG00020013805	Protein coding	7.57606	3.53031e-06	0.000696857
ENSOART00020021158	MYO10	Protein coding	-22.5755	4.65406e-10	3.21085e-07
ENSOART00020020747	ABR	Protein coding	9.21088	0.000380501	0.0474367
ENSOART00020020698	ERBB2	Protein coding	22.6792	2.55398e-10	1.91041e-07
ENSOART00020020501	ENSOARG00020013189	Protein coding	12.1138	3.15169e-15	1.99078e-11
ENSOART00020020185	ATF4	Protein coding	-24.2486	2.96656e-11	4.68462e-08
ENSOART00020019556	COL5A2	Protein coding	-25.0842	1.18789e-11	2.17841e-08
ENSOART00020019543	APLP2	Protein coding	-22.5716	5.75391e-10	3.702e-07
ENSOART00020019357	KDM4B	Protein coding	21.3795	4.61934e-09	1.55388e-06
ENSOART00020019041	ACAD8	Protein coding	-23.2358	1.46458e-10	1.30692e-07
ENSOART00020018963	SERPING1	Protein coding	9.39855	0.000217565	0.0301668
ENSOART00020018925	PACS2	Protein coding	-22.1919	1.10147e-09	5.69252e-07
ENSOART00020018917	TJP1	Protein coding	-21.664	7.40841e-09	2.24022e-06
ENSOART00020018468	GREB1	Protein coding	6.87207	0.000177003	0.0253173
ENSOART00020018239	FAP	Protein coding	-22.6147	5.73751e-10	3.702e-07
ENSOART00020018211	STK4	Protein coding	7.78887	1.99673e-06	0.000399691
ENSOART00020018046	LSM3	Protein coding	-6.56329	0.000275087	0.0367099
ENSOART00020017899	STK4	Protein coding	-7.93133	4.74221e-06	0.000913865
ENSOART00020017871	PYGM	Protein coding	2.68432	5.25704e-06	0.00100625
ENSOART00020017556	TNKS2	Protein coding	-9.47351	6.01595e-11	7.87825e-08
ENSOART00020017272	GIGYF2	Protein coding	-21.1793	1.80871e-08	4.42918e-06
ENSOART00020016984	ZFAND2B	Protein coding	5.78774	8.91283e-05	0.0139968
ENSOART00020016894	LPIN	Protein coding	-21.7863	5.41204e-09	1.75811e-06
ENSOART00020016766	ZFYVE1	Protein coding	-21.3768	8.08466e-09	2.39377e-06
ENSOART00020016545	INTS11	Protein coding	-22.3754	1.0387e-09	5.62575e-07
ENSOART00020016117	CTBP1	Protein coding	21.6676	3.32079e-09	1.25856e-06
ENSOART00020016003	ENPP2	Protein coding	-9.71952	8.81337e-10	5.01031e-07
ENSOART00020015469	SRRM1	Protein coding	22.0062	1.45537e-09	6.78167e-07
ENSOART00020015043	WIPI2	Protein coding	9.90691	0.000129706	0.0192523
ENSOART00020014858	SCAF1	Protein coding	-21.906	3.75757e-09	1.33539e-06
ENSOART00020014822	LUM	Protein coding	-21.5085	7.58513e-09	2.26951e-06
ENSOART00020014419	FBXO8	Protein coding	-21.4826	1.54314e-08	3.98755e-06
ENSOART00020014292	GPBP1	Protein coding	-23.219	1.5173e-10	1.30692e-07
ENSOART00020014273	FCGRT	Protein coding	23.45	9.1051e-11	9.76634e-08
ENSOART00020014165	EIF4B	Protein coding	21.2337	1.10177e-08	3.07032e-06
ENSOART00020014064	PCMTD2	Protein coding	-21.4471	1.72196e-08	4.31241e-06
ENSOART00020014049	PLK	Protein coding	-23.219	1.5173e-10	1.30692e-07
ENSOART00020013149	CSMD2	Protein coding	-6.54945	0.000274913	0.0367099
ENSOART00020013137	RALGAPA1	Protein coding	-22.3684	1.05887e-09	5.62575e-07
ENSOART00020013038	MICAL1	Protein coding	-9.49651	0.000259433	0.0350321
ENSOART00020012981	ENSOARG00020008504	Protein coding	-10.9129	2.00758e-13	8.77913e-10
ENSOART00020012979	CCT7	Protein coding	-22.4675	7.71399e-10	4.56805e-07
ENSOART00020012832	DCAF12	Protein coding	-21.4471	1.72196e-08	4.31241e-06
ENSOART00020012830	ENSOARG00020008386	Protein coding	-8.73822	1.07822e-09	5.63773e-07
ENSOART00020012037	ENSOARG00020007836	Protein coding	-7.6779	1.72507e-06	0.000346532
ENSOART00020011994	ENSOARG00020007506	Protein coding	-20.9386	4.03895e-08	9.07551e-06
ENSOART00020011936	ST3GAL4	Protein coding	1.85427	0.000270054	0.0362939
ENSOART00020011609	CPXM1	Protein coding	3.6306	5.70505e-12	1.41905e-08
ENSOART00020011288	SPTAN1	Protein coding	-21.5554	1.13641e-08	3.12094e-06
ENSOART00020011068	ENSOARG00020007094	Protein coding	6.81565	8.95993e-05	0.014032
ENSOART00020010727	ENSOARG00020007012	Protein coding	11.228	3.86622e-16	3.66318e-12
ENSOART00020010058	NFU1	Protein coding	-24.0824	3.71696e-11	5.71096e-08
ENSOART00020009909	ILF3	Protein coding	-21.9418	3.55685e-09	1.33028e-06
ENSOART00020009901	FXR1	Protein coding	-10.0451	0.000353593	0.0446698
ENSOART00020009845	ENSOARG00020006375	Protein coding	-21.7434	6.2091e-09	1.93946e-06
ENSOART00020009812	LRPPRC	Protein coding	-21.8419	4.81808e-09	1.61119e-06
ENSOART00020009386	PIK3C2A	Protein coding	-7.22579	3.29867e-05	0.00563142
ENSOART00020008858	UTP20	Protein coding	-22.3464	1.05696e-09	5.62575e-07
ENSOART00020008609	CALU	Protein coding	7.22667	4.88248e-05	0.0081159
ENSOART00020008267	APMAP	Protein coding	2.07215	0.000102091	0.0158141
ENSOART00020008230	APMAP	Protein coding	-9.95907	0.00015538	0.0228467
ENSOART00020007925	ENSOARG00020004559	Protein coding	-6.79808	8.63421e-05	0.0136726
ENSOART00020007704	PARP8	Protein coding	6.97556	3.63459e-05	0.00616784
ENSOART00020007607	HDAC2	Protein coding	-23.2388	1.45585e-10	1.30692e-07
ENSOART00020007445	NMD3	Protein coding	-21.8422	4.55904e-09	1.54272e-06
ENSOART00020007179	EIF2A	Protein coding	-21.7723	5.98365e-09	1.87936e-06
ENSOART00020006971	SEPTIN7	Protein coding	7.77857	7.86246e-05	0.0125554
ENSOART00020006942	ENSOARG00020004306	Protein coding	22.0589	1.19194e-09	5.93914e-07
ENSOART00020006698	VIRMA	Protein coding	-2.26571	0.000233849	0.0319569
ENSOART00020006511	LAMC1	Protein coding	10.2321	0.000188222	0.0266175
ENSOART00020006293	PIK3R1	Protein coding	-22.0284	2.59147e-09	1.04484e-06
ENSOART00020006006	ACACB	Protein coding	6.70429	0.000343621	0.0437994
ENSOART00020005721	FRMD4A	Protein coding	21.0339	2.00801e-08	4.81661e-06
ENSOART00020005552	SET	Protein coding	-22.1749	1.56482e-09	7.17405e-07
ENSOART00020004638	BIRC6	Protein coding	-10.1304	8.15648e-05	0.0129884
ENSOART00020003668	VGLL3	Protein coding	-4.27777	1.2734e-05	0.00228364
ENSOART00020003465	ENSOARG00020002275	Protein coding	-8.04239	0.000229726	0.0316216
ENSOART00020003445	PDE4DIP	Protein coding	-22.1554	1.90495e-09	8.26676e-07
ENSOART00020002666	VCP	Protein coding	10.1631	0.000118203	0.0177771
ENSOART00020002584	UBAP2L	Protein coding	-22.359	1.02005e-09	5.62575e-07
ENSOART00020002583	PIGO	Protein coding	-22.6835	4.87158e-10	3.29696e-07
ENSOART00020002481	COL5A1	Protein coding	-22.9528	2.25432e-10	1.76534e-07
ENSOART00020002400	COL5A3	Protein coding	6.44458	0.000296984	0.0391723
ENSOART00020002132	WDR91	Protein coding	-22.4774	8.03584e-10	4.70958e-07
ENSOART00020002016	DPYD	Protein coding	22.1462	7.67341e-10	4.56805e-07
ENSOART00020001739	HEATR5B	Protein coding	7.73492	0.000403757	0.0495749
ENSOART00020001348	ENSOARG00020000933	Protein coding	20.5988	1.03318e-08	2.95152e-06
ENSOART00020001307	MET	Protein coding	-21.7723	5.98365e-09	1.87936e-06
ENSOART00020001277	LRRK2	Protein coding	21.2534	9.64672e-09	2.79688e-06
ENSOART00020001061	IGSF3	Protein coding	-21.5343	1.1319e-08	3.12094e-06
ENSOART00020000951	MAST2	Protein coding	7.73408	1.40746e-06	0.000284743
ENSOART00020000623	OS9	Protein coding	-23.3402	1.20299e-10	1.22123e-07
ENSOART00020000318	NCKAP5L	Protein coding	7.42269	3.6348e-06	0.000712534
ENSOART00020000316	TAC1	Protein coding	-3.49464	3.71384e-05	0.00628358
ENSOART00020000154	ENSOARG00020000133	Protein coding	-9.97382	0.000114328	0.0172857
ENSOART00020000034	CYTB	Protein coding	-11.2513	3.4546e-05	0.00587995
9.281.2	CPSF1	Protein coding	-22.3606	1.08095e-09	5.63773e-07
9.109.2	TTPA	Protein coding	-3.33243	1.61055e-05	0.00284343
X.343.5	X.343	Protein coding (Predicted)	9.18458	0.000361942	0.0455222
X.215.5	X.215	Protein coding (Predicted)	-21.4983	1.46638e-08	3.85936e-06
9.109.1	9.109	Protein coding (Predicted)	-6.97164	0.000156978	0.0230002
9.107.27	ASPH	Protein coding (Predicted)	-25.4544	8.00992e-12	1.82142e-08
8.366.5	SYNCRIP	Protein coding (Predicted)	-8.04388	1.3522e-07	2.91179e-05
8.341.3	8.341	Protein coding (Predicted)	-2.4049	0.000322583	0.0417543
8.186.1	ZBTB2	Protein coding (Predicted)	-21.4398	1.57804e-08	4.04499e-06
7.720.5	LGALS3	Protein coding (Predicted)	10.5924	1.02601e-11	2.16028e-08
7.489.3	ADCY4	Protein coding (Predicted)	-9.29536	5.13212e-06	0.000985662
7.309.1	DCAF5	Protein coding (Predicted)	21.0018	2.21458e-08	5.22393e-06
7.110.5	LRP10	Protein coding (Predicted)	-21.4372	1.79866e-08	4.42918e-06
6.585.9	ENSOARG00020011415	Protein coding (Predicted)	6.46175	0.000351974	0.0446698
6.253.9	ADD1	Protein coding (Predicted)	21.5745	1.78766e-09	8.0021e-07
6.218.10	WFS1	Protein coding (Predicted)	9.82041	0.000364434	0.0457345
6.115.3	RBM47	Protein coding (Predicted)	7.06186	5.48876e-05	0.0089688
5.937.2	ENSOARG00020015724	Protein coding (Predicted)	2.58954	0.000224163	0.0309306
5.879.9	IK	Protein coding (Predicted)	-21.922	3.7819e-09	1.33539e-06
5.879.5	IK	Protein coding (Predicted)	-22.0653	2.12857e-09	8.96348e-07
5.653.11	DNM2	Protein coding (Predicted)	-22.3457	9.70368e-10	5.40828e-07
5.624.4	Transportin 2	Protein coding (Predicted)	20.8831	2.43354e-08	5.66984e-06
5.576.3	SUGP2	Protein coding (Predicted)	21.0773	1.32015e-08	3.57378e-06
5.421.23	SPARC	Protein coding (Predicted)	6.00369	0.000163331	0.0238082
5.343.1	SPOCK1	Protein coding (Predicted)	5.90982	0.000402173	0.0494873
5.204.2	SPPL2B	Protein coding (Predicted)	-21.9304	3.67625e-09	1.33533e-06
5.162.2	ADAMTS10	Protein coding (Predicted)	-21.905	3.94626e-09	1.35964e-06
4.611.4	LEP	Protein coding (Predicted)	-2.7649	0.000210187	0.0293585
4.380.22	COL1A2	Protein coding (Predicted)	8.41945	3.4712e-08	7.86193e-06
4.380.12	COL1A2	Protein coding (Predicted)	8.3197	3.41398e-06	0.000676242
4.212.14	OGDH	Protein coding (Predicted)	10.12	4.34187e-09	1.47803e-06
4.212.11	OGDH	Protein coding (Predicted)	6.02191	0.000388338	0.0481716
3.971.11	NSMF	Protein coding (Predicted)	-9.55848	8.16179e-06	0.00151137
3.969.1	DPH7	Protein coding (Predicted)	2.50726	0.000260554	0.0351001
3.902.3	DPH7	Protein coding (Predicted)	-21.7106	7.26027e-09	2.20716e-06
3.90.1	ZNF79	Protein coding (Predicted)	-21.1793	1.80871e-08	4.42918e-06
3.735.4	MYH9	Protein coding (Predicted)	-23.3187	1.25276e-10	1.24564e-07
3.656.3	NAB2	Protein coding (Predicted)	-2.95701	7.38751e-06	0.00138149
3.505.27	PCBP2	Protein coding (Predicted)	-9.22848	0.000306479	0.0401452
3.448.3	RPP38	Protein coding (Predicted)	-22.0858	2.17349e-09	9.08535e-07
3.438.2	ZC3H8	Protein coding (Predicted)	-7.21149	0.000177692	0.0253173
3.1877.8	PNPLA3	Protein coding (Predicted)	20.7369	4.82953e-08	1.0683e-05
3.1824.1	GGA1	Protein coding (Predicted)	-21.4983	1.46638e-08	3.85936e-06
3.1793.4	NOP2	Protein coding (Predicted)	6.85257	0.000117548	0.0177254
3.17.2	RABL6	Protein coding (Predicted)	6.85765	6.13618e-06	0.00117059
3.1637.5	ENSOARG00020021496	Protein coding (Predicted)	-7.86692	1.12318e-05	0.00204652
3.1637.4	ENSOARG00020021496	Protein coding (Predicted)	-3.89533	2.61448e-05	0.00450396
3.1611.2	TXNRD1	Protein coding (Predicted)	-21.9304	3.67625e-09	1.33533e-06
3.1558.1	STAT6	Protein coding (Predicted)	-22.3684	1.05887e-09	5.62575e-07
3.1551.4	DCTN2	Protein coding (Predicted)	2.15976	6.60012e-06	0.0012507
3.143.5	SDC1	Protein coding (Predicted)	20.8305	2.87166e-08	6.5827e-06
3.1134.2	EMILIN1	Protein coding (Predicted)	2.43685	8.29439e-05	0.0131712
3.1133.4	TMEM214	Protein coding (Predicted)	-21.9901	3.06842e-09	1.17863e-06
3.1112.1	DDX1	Protein coding (Predicted)	-21.7837	5.76922e-09	1.85057e-06
25.82.2	MICU1	Protein coding (Predicted)	-22.0399	2.65382e-09	1.05502e-06
25.77.19	PSAP	Protein coding (Predicted)	-6.50184	0.000166814	0.0241303
25.63.1	PBLD	Protein coding (Predicted)	-6.22675	0.000280372	0.0373275
25.58.3	HERC4	Protein coding (Predicted)	-3.47914	0.000125804	0.018722
25.311.10	ENSOARG00020016428	Protein coding (Predicted)	-21.3312	2.30179e-08	5.40722e-06
25.129.3	ARHGAP22	Protein coding (Predicted)	-21.4471	1.72196e-08	4.31241e-06
24.65.3	PPL	Protein coding (Predicted)	-6.81088	5.01495e-05	0.0083118
24.65.2	PPL	Protein coding (Predicted)	-21.9304	3.67625e-09	1.33533e-06
24.599.5	ENSOARG00020024797	Protein coding (Predicted)	5.089	0.000123491	0.0184261
24.516.8	RABEP2	Protein coding (Predicted)	-21.922	3.7819e-09	1.33539e-06
24.484.24	ACSM1	Protein coding (Predicted)	6.83204	0.000108224	0.0164944
24.433.6	MGRN1	Protein coding (Predicted)	-7.5594	7.7676e-06	0.00144781
24.286.3	MEPCE	Protein coding (Predicted)	8.12769	1.07812e-06	0.000220468
24.240.21	ELN	Protein coding (Predicted)	-21.422	1.89505e-08	4.58432e-06
22.211.4	BNIP3	Protein coding (Predicted)	-5.5861	0.000177675	0.0253173
21.453.4	NDUFV1	Protein coding (Predicted)	9.80226	7.15857e-08	1.56522e-05
21.447.9	ENSOARG00020011311	Protein coding (Predicted)	-22.1022	2.19773e-09	9.11963e-07
21.39.11	THRSP	Protein coding (Predicted)	10.866	4.85363e-05	0.00809162
21.388.2	FERMT3	Protein coding (Predicted)	-21.4928	1.41271e-08	3.78826e-06
21.324.2	TBRG1	Protein coding (Predicted)	6.73211	0.000316755	0.0412261
21.169.5	RELA	Protein coding (Predicted)	21.9244	1.27403e-09	6.19039e-07
20.411.1	ENSOARG00020016816	Protein coding (Predicted)	-4.37794	0.000297835	0.0391935
20.408.6	BAG6	Protein coding (Predicted)	8.99692	5.83085e-07	0.00012142
20.408.4	BAG6	Protein coding (Predicted)	-23.7706	6.09761e-11	7.87825e-08
20.408.22	BAG6	Protein coding (Predicted)	11.6528	1.15584e-05	0.00209931
20.304.2	KCTD20	Protein coding (Predicted)	-10.8733	0.000109035	0.0165736
20.23.1	RGL2	Protein coding (Predicted)	-22.1732	1.81122e-09	8.04424e-07
20.166.1	ATAT1	Protein coding (Predicted)	8.93659	2.00957e-07	4.27872e-05
20.161.3	DDR1	Protein coding (Predicted)	8.72681	5.9703e-08	1.31045e-05
20.134.1	20.134	Protein coding (Predicted)	3.2966	5.49023e-05	0.0089688
2.938.1	UBAP2	Protein coding (Predicted)	-23.0174	2.27641e-10	1.76534e-07
2.925.5	HNRNPK	Protein coding (Predicted)	-22.9969	2.38672e-10	1.8091e-07
2.884.11	2.884	Protein coding (Predicted)	19.4063	3.17452e-07	6.68402e-05
2.881.1	SPIN1	Protein coding (Predicted)	-8.31812	2.43055e-05	0.00422551
2.844.8	FKBP15	Protein coding (Predicted)	-8.87254	1.93231e-09	8.32197e-07
2.844.4	FKBP16	Protein coding (Predicted)	-23.1954	1.58973e-10	1.34888e-07
2.768.20	SRRM1	Protein coding (Predicted)	20.8874	3.16985e-08	7.23707e-06
2.696.7	EIF3I	Protein coding (Predicted)	8.17872	4.08782e-06	0.000795851
2.407.17	COL3A1	Protein coding (Predicted)	9.5516	0.000174852	0.0251015
2.400.1	C2orf88	Protein coding (Predicted)	-1.9405	0.000142805	0.0211217
2.354.7	SCARA5	Protein coding (Predicted)	20.7467	1.44845e-08	3.85936e-06
2.348.4	clusterin	Protein coding (Predicted)	-25.9204	5.49547e-17	7.81029e-13
2.1579.5	HP1BP3	Protein coding (Predicted)	-23.7033	6.67567e-11	8.29201e-08
2.1524.2	2.1524	Protein coding (Predicted)	-21.362	9.74129e-09	2.79688e-06
2.152.1	BMP1	Protein coding (Predicted)	-8.188	8.14729e-07	0.000167814
2.1482.7	ITM2C	Protein coding (Predicted)	-10.561	5.20374e-05	0.00859963
2.1185.3	FRZB	Protein coding (Predicted)	2.48924	0.000328284	0.0423188
2.1107.4	SCARA3	Protein coding (Predicted)	21.7993	2.37416e-09	9.70998e-07
2.1107.2	SCARA3	Protein coding (Predicted)	-9.72015	0.000231866	0.0317623
19.69.1	BRPF1	Protein coding (Predicted)	-7.12287	0.000230853	0.0316999
19.655.9	TPRA1	Protein coding (Predicted)	21.3003	9.10365e-09	2.68152e-06
19.655.3	TPRA2	Protein coding (Predicted)	4.40012	1.18183e-08	3.2301e-06
19.644.5	ENSOARG00020015686	Protein coding (Predicted)	-7.08686	1.37256e-05	0.00244605
19.632.9	RAF1	Protein coding (Predicted)	7.4576	8.65572e-06	0.00158732
19.610.4	LTF	Protein coding (Predicted)	4.76396	5.26881e-07	0.00011012
19.595.5	ENSOARG00020024914	Protein coding (Predicted)	-21.4826	1.54314e-08	3.98755e-06
19.583.4	IP6K2	Protein coding (Predicted)	-8.61535	1.31368e-06	0.000266719
19.573.1	USP19	Protein coding (Predicted)	-22.6231	5.58361e-10	3.69096e-07
19.392.3	19.392	Protein coding (Predicted)	-22.5929	5.86079e-10	3.702e-07
19.322.4	CMC1	Protein coding (Predicted)	-6.69588	0.000303116	0.0397964
19.310.2	ENSOARG00020018222	Protein coding (Predicted)	-10.1008	0.00010241	0.0158204
19.307.6	EEFSEC	Protein coding (Predicted)	9.49411	5.30372e-11	7.52964e-08
19.228.2	RNF123	Protein coding (Predicted)	-22.2675	1.39375e-09	6.65828e-07
19.219.12	RBM5	Protein coding (Predicted)	-22.0399	2.65382e-09	1.05502e-06
18.60.1	FURIN	Protein coding (Predicted)	-21.9304	3.67625e-09	1.33533e-06
18.47.6	PLIN1	Protein coding (Predicted)	-10.9383	2.04945e-05	0.00359596
18.47.3	PLIN1	Protein coding (Predicted)	-28.2196	5.07645e-13	1.92394e-09
18.47.26	PLIN1	Protein coding (Predicted)	-9.45713	8.30216e-06	0.00152741
18.437.9	PLIN1	Protein coding (Predicted)	-9.17062	4.07616e-07	8.55077e-05
18.437.8	PLIN1	Protein coding (Predicted)	-2.90046	1.76744e-05	0.00311075
18.437.7	PLIN1	Protein coding (Predicted)	11.7554	2.47941e-12	6.71199e-09
18.437.6	PLIN1	Protein coding (Predicted)	-10.7056	0.000103784	0.0159891
18.437.4	PLIN1	Protein coding (Predicted)	9.25619	2.0319e-08	4.84319e-06
18.437.25	PLIN1	Protein coding (Predicted)	-9.36234	1.96566e-10	1.61951e-07
18.437.15	CCDC197	Protein coding (Predicted)	-4.43812	7.83407e-08	1.70636e-05
18.254.2	ENSOARG00020017719	Protein coding (Predicted)	2.7135	0.000155529	0.0228467
17.523.2	MAPK1	Protein coding (Predicted)	-23.2259	1.5083e-10	1.30692e-07
17.227.7	THOC5	Protein coding (Predicted)	5.55696	0.000370236	0.0462583
17.223.10	RHBDD3	Protein coding (Predicted)	6.5156	0.000331798	0.0426644
17.201.4	USP30	Protein coding (Predicted)	-6.8889	6.38314e-05	0.0103383
16.42.4	MCCC2	Protein coding (Predicted)	1.7002	0.000359079	0.0452622
16.333.9	OXCT1	Protein coding (Predicted)	-21.6891	7.82963e-09	2.3304e-06
16.20.5	DUSP1	Protein coding (Predicted)	-3.24865	5.43598e-05	0.00893151
16.116.3	GHR	Protein coding (Predicted)	-25.8338	5.74119e-12	1.41905e-08
15.76.2	MCAM	Protein coding (Predicted)	23.1425	1.50912e-10	1.30692e-07
15.593.4	TSPAN18	Protein coding (Predicted)	23.0697	1.32068e-10	1.27253e-07
15.527.13	DGAT2	Protein coding (Predicted)	24.6708	1.8222e-11	2.99158e-08
15.523.2	TPBGL	Protein coding (Predicted)	3.96928	0.000178733	0.0254019
15.436.1	ENSOARG00020007898	Protein coding (Predicted)	-5.04486	7.02048e-06	0.00131852
15.327.19	ACAT1	Protein coding (Predicted)	-22.9888	2.27788e-10	1.76534e-07
15.313.3	ENSOARG00020023366	Protein coding (Predicted)	-21.4078	1.99458e-08	4.80466e-06
15.260.1	TCN1	Protein coding (Predicted)	10.0906	0.000388939	0.0481716
15.246.11	SLC43A3	Protein coding (Predicted)	-22.6876	4.51566e-10	3.16927e-07
14.770.8	CLPTM1	Protein coding (Predicted)	1.62786	0.000247435	0.0335714
14.770.6	CLPTM1	Protein coding (Predicted)	-23.487	9.68271e-11	1.01936e-07
14.746.81	LIPE	Protein coding (Predicted)	-22.5929	5.86079e-10	3.702e-07
14.746.57	LIPE	Protein coding (Predicted)	-22.9585	2.59194e-10	1.91363e-07
14.746.46	LIPE	Protein coding (Predicted)	13.3583	7.9105e-13	2.64532e-09
14.737.9	AXL	Protein coding (Predicted)	20.8305	2.87166e-08	6.5827e-06
14.668.5	USF2	Protein coding (Predicted)	-9.77946	0.000194429	0.0273591
14.61.2	APRT	Protein coding (Predicted)	-6.97349	9.25177e-05	0.0144493
14.568.4	CDH5	Protein coding (Predicted)	-22.1554	1.90495e-09	8.26676e-07
14.563.1	14.563	Protein coding (Predicted)	2.53227	0.00018143	0.0257209
14.540.15	ENSOARG00020010668(Liver carboxylesterase-like)	Protein coding (Predicted)	-21.8073	5.36114e-09	1.75158e-06
14.494.4	RPL13	Protein coding (Predicted)	13.6546	4.45862e-22	1.26734e-17
14.494.1	RPL13	Protein coding (Predicted)	2.3299	9.71919e-05	0.0151377
14.282.1	SYMPK	Protein coding (Predicted)	-22.1821	1.76672e-09	7.97113e-07
14.212.12	ECH1	Protein coding (Predicted)	8.1248	1.56138e-07	3.34955e-05
14.173.2	CEBPA	Protein coding (Predicted)	8.50319	1.06082e-08	2.98546e-06
14.147.2	CHTF8	Protein coding (Predicted)	-22.0219	2.80185e-09	1.09097e-06
14.111.1	KIFC3	Protein coding (Predicted)	-22.4218	8.64911e-10	4.9666e-07
14.10.2	ENSOARG00020017377	Protein coding (Predicted)	6.11207	8.15589e-06	0.00151137
13.681.4	SGK2	Protein coding (Predicted)	8.20286	1.41447e-05	0.00251285
13.624.23	ACSS2	Protein coding (Predicted)	7.26204	0.000111356	0.0168812
13.595.7	TBC1D20	Protein coding (Predicted)	10.0212	0.000107218	0.0163851
13.595.15	TBC1D20	Protein coding (Predicted)	-8.69906	1.25138e-11	2.22311e-08
13.548.4	CPXM1	Protein coding (Predicted)	2.82641	3.93538e-05	0.00663864
13.548.2	CPXM1	Protein coding (Predicted)	2.34319	2.80321e-05	0.00481449
13.548.1	CPXM1	Protein coding (Predicted)	3.01458	0.000143043	0.0211217
13.546.2	ENSOARG00020007012	Protein coding (Predicted)	11.7783	3.49628e-13	1.41971e-09
13.545.2	ENSOARG00020006897	Protein coding (Predicted)	6.12453	7.39145e-07	0.000153186
13.545.1	ENSOARG00020006897	Protein coding (Predicted)	3.31502	3.61253e-06	0.000710619
13.257.9	GSS	Protein coding (Predicted)	5.83905	0.000212009	0.0295404
13.227.3	FAM210B	Protein coding (Predicted)	-2.28326	4.63604e-06	0.000896444
13.188.2	PRPF6	Protein coding (Predicted)	-22.6667	5.05456e-10	3.38055e-07
13.15.2	FLRT3	Protein coding (Predicted)	7.19979	0.000342723	0.0437831
13.138.1	WDR37	Protein coding (Predicted)	-21.905	3.94626e-09	1.35964e-06
13.129.2	NET1	Protein coding (Predicted)	-23.3111	1.27086e-10	1.24564e-07
12.578.4	ADIPOR1	Protein coding (Predicted)	-22.8351	3.29914e-10	2.40453e-07
12.528.5	LAMC1	Protein coding (Predicted)	22.2234	8.95944e-10	5.04292e-07
12.515.2	TOR1AIP1	Protein coding (Predicted)	-8.97189	2.613e-07	5.52217e-05
12.466.18	NADK	Protein coding (Predicted)	-9.0775	3.43615e-08	7.81367e-06
12.465.1	GNB1	Protein coding (Predicted)	-21.6985	7.5556e-09	2.26951e-06
12.431.3	CTNNBIP1	Protein coding (Predicted)	-7.95461	2.56658e-07	5.44431e-05
12.351.7	COQ8A	Protein coding (Predicted)	7.69241	8.25029e-06	0.00152279
12.202.3	ANGPTL1	Protein coding (Predicted)	21.346	5.92374e-09	1.87936e-06
12.156.5	TPRG1L	Protein coding (Predicted)	9.44826	1.84181e-11	2.99158e-08
12.119.3	PGD	Protein coding (Predicted)	-22.6994	4.68786e-10	3.21085e-07
12.115.5	TARDBP	Protein coding (Predicted)	-8.72327	1.11295e-05	0.00203441
11.99.3	FASN	Protein coding (Predicted)	-10.449	0.000316906	0.0412261
11.99.15	FASN	Protein coding (Predicted)	-25.653	1.02574e-11	2.16028e-08
11.952.4	ZNF207	Protein coding (Predicted)	-21.882	3.86585e-09	1.34828e-06
11.897.2	INPP5K	Protein coding (Predicted)	-21.578	1.11525e-08	3.09272e-06
11.734.20	NFE2L1	Protein coding (Predicted)	-23.5714	6.98125e-11	8.44419e-08
11.7.2	ABCA9	Protein coding (Predicted)	-2.18836	4.62164e-05	0.00772833
11.689.28	ACLY	Protein coding (Predicted)	2.36652	7.39035e-05	0.0118682
11.689.18	ACLY	Protein coding (Predicted)	22.9316	2.29793e-10	1.76534e-07
11.689.14	ACLY	Protein coding (Predicted)	-23.7919	5.68885e-11	7.70013e-08
11.660.12	ACLY	Protein coding (Predicted)	-8.30156	1.2038e-06	0.000245286
11.658.7	UBTF	Protein coding (Predicted)	-21.882	3.86585e-09	1.34828e-06
11.493.5	AKAP1	Protein coding (Predicted)	-21.5068	1.34853e-08	3.6333e-06
11.367.4	SERPINF1	Protein coding (Predicted)	2.45918	0.000288653	0.0382509
11.317.4	CHD3	Protein coding (Predicted)	-23.2008	1.82859e-10	1.52873e-07
11.265.3	Srebp1	Protein coding (Predicted)	9.73278	1.40782e-09	6.66942e-07
11.236.9	COL1A1	Protein coding (Predicted)	3.29075	0.00039453	0.0486521
11.236.16	COL1A1	Protein coding (Predicted)	3.73198	5.37027e-05	0.00884912
11.195.8	ERBB2	Protein coding (Predicted)	21.0882	1.5796e-08	4.04499e-06
10.307.3	MTIF3	Protein coding (Predicted)	-21.7954	5.56168e-09	1.79645e-06
10.198.3	RASA3	Protein coding (Predicted)	-21.5991	9.20904e-09	2.69858e-06
10.185.7	COL4A1	Protein coding (Predicted)	-23.1949	1.36865e-10	1.29677e-07
10.185.6	COL4A1	Protein coding (Predicted)	-6.89935	0.000384857	0.0478747
10.185.4	COL4A1	Protein coding (Predicted)	-27.4553	1.69597e-12	5.07442e-09
1.803.4	EIF4A2	Protein coding (Predicted)	22.0565	1.20143e-09	5.93914e-07
1.702.1	B4GALT4	Protein coding (Predicted)	-7.29671	3.92394e-06	0.000766571
1.633.1	CYP4F22	Protein coding (Predicted)	4.11944	0.000209169	0.0292883
1.534.17	DCAF8	Protein coding (Predicted)	6.95976	0.000353325	0.0446698
1.532.8	TAGLN2	Protein coding (Predicted)	21.4102	6.65924e-09	2.05397e-06
1.483.2	PBXIP1	Protein coding (Predicted)	21.0077	2.03614e-08	4.84319e-06
1.469.1	CRTC2	Protein coding (Predicted)	-22.4218	8.64911e-10	4.9666e-07
1.2044.5	RAB5A	Protein coding (Predicted)	21.6002	3.68778e-09	1.33533e-06
1.2008.6	COL6A2	Protein coding (Predicted)	-22.7792	3.89891e-10	2.77061e-07
1.2007.14	COL6A1	Protein coding (Predicted)	10.2065	1.81893e-07	3.88739e-05
1.2005.2	COL18A1	Protein coding (Predicted)	-23.3746	1.12822e-10	1.16614e-07
1.1865.7	ENSOARG00020005029	Protein coding (Predicted)	-21.7405	5.79431e-09	1.85057e-06
1.1802.4	MASP1	Protein coding (Predicted)	3.83135	0.00010634	0.0162946
1.1625.3	ENSOARG00020003933	Protein coding (Predicted)	-2.80025	1.81065e-08	4.42918e-06
1.150.1	1.150	Protein coding (Predicted)	4.67697	1.86749e-14	9.65134e-11
1.15.3	GPC1	Protein coding (Predicted)	-9.09046	6.30789e-06	0.00119932
1.1489.5	TUFT1	Protein coding (Predicted)	-21.362	9.74129e-09	2.79688e-06
1.118.6	GC-rich promoter binding protein 1 like 1	Protein coding (Predicted)	-10.9737	1.60019e-12	5.05384e-09
1.1032.1	POFUT2	Protein coding (Predicted)	-21.4471	1.72196e-08	4.31241e-06
PEKD01007288.1.1.1	PEKD01007288.1	Unannotated	7.79812	6.07803e-05	0.00990057
PEKD01006998.1.1.6	PEKD01006998.1	Unannotated	11.0342	4.03506e-11	5.94632e-08
PEKD01006998.1.1.3	PEKD01006998.1	Unannotated	12.088	1.27281e-14	7.23582e-11
6.253.2	ADD1	unannotated	-22.0864	1.11329e-09	5.70177e-07
6.13.1	6.13	unannotated	-1.62719	0.000106282	0.0162946
3.67.2	PHYHD1	unannotated	6.70479	0.000214791	0.0298548
3.1637.3	ENSOARG00020021496	unannotated	-3.81295	4.43912e-05	0.00746626
25.77.1	PSAP	unannotated	-25.5592	7.70924e-12	1.82142e-08
22.289.6	SCD	unannotated	9.6728	2.52715e-08	5.86391e-06
22.289.3	SCD	unannotated	-28.0396	7.11834e-13	2.52919e-09
22.289.14	SCD	unannotated	3.54783	6.81167e-06	0.0012865
21.227.21	ENSOARG00020008975	unannotated	10.8553	1.14348e-11	2.17841e-08
2.1602.2	2.1602	unannotated	8.10678	8.65535e-08	1.87805e-05
11.909.2	TRARG2	unannotated	-22.5552	6.41777e-10	3.88131e-07
11.236.1	COL1A1	unannotated	3.97308	0.000164429	0.0239069
1.1398.3	GSTM5	unannotated	-4.88325	0.000168277	0.0242801
1.1247.2	1.1247	unannotated	11.5482	5.06863e-16	4.11638e-12
