# Supplementary material for: Integrative analysis of Iso-Seq and RNA-seq data reveals transcriptome complexity and differentially expressed transcripts in sheep tail fat
Source: PeerJ. 2021 Nov 3;9:e12454. doi: 10.7717/peerj.12454 (PMC8571958; doi:10.7717/peerj.12454)
Supplement: Supplemental Information 8 [file peerj-09-12454-s008.xlsx]

## Sheet: GO
GO_class	GO ID	GO_term	Hit_number	Background number	P-Value	Q-Value	Gene IDs
Molecular Function	GO:0005201	extracellular matrix structural constituent	12	211	3.94785e-08	0.000186536	11.236.9,ENSOART00020027615,ENSOART00020033210,10.185.4,4.380.12,4.380.22,ENSOART00020019556,10.185.6,24.240.21,3.1134.2,2.407.17,10.185.7
Molecular Function	GO:0004181	metallocarboxypeptidase activity	6	35	1.5588e-07	0.00034751	13.548.1,ENSOART00020011609,13.546.2,13.548.2,ENSOART00020010727,13.548.4
Molecular Function	GO:0004185	serine-type carboxypeptidase activity	6	37	2.20641e-07	0.00034751	13.548.1,ENSOART00020011609,13.546.2,13.548.2,ENSOART00020010727,13.548.4
Cellular Component	GO:0031012	extracellular matrix	28	1414	1.02015e-06	0.00120505	ENSOART00020037589,2.925.5,ENSOART00020027615,10.185.4,11.236.9,1.150.1,5.421.23,24.240.21,10.185.6,ENSOART00020019556,10.185.7,2.407.17,7.720.5,2.348.4,ENSOART00020033210,ENSOART00020039107,1.2008.6,ENSOART00020022280,1.2007.14,4.380.22,4.380.12,3.1134.2,5.343.1,1.1625.3,1.15.3,4.18.1,ENSOART00020014822,11.367.4
Molecular Function	GO:0070008	serine-type exopeptidase activity	6	50	1.39689e-06	0.00132006	13.546.2,ENSOART00020011609,13.548.1,ENSOART00020010727,13.548.2,13.548.4
Cellular Component	GO:0005578	proteinaceous extracellular matrix	21	899	1.97455e-06	0.00155496	10.185.6,24.240.21,ENSOART00020019556,2.407.17,10.185.7,10.185.4,ENSOART00020027615,ENSOART00020037589,11.236.9,5.421.23,5.343.1,3.1134.2,1.15.3,1.1625.3,ENSOART00020014822,ENSOART00020033210,1.2008.6,ENSOART00020039107,1.2007.14,4.380.12,4.380.22
Cellular Component	GO:0005581	collagen trimer	12	320	3.31257e-06	0.00223599	4.380.12,4.380.22,1.2007.14,11.236.9,ENSOART00020027615,10.185.4,ENSOART00020014822,10.185.7,2.407.17,ENSOART00020019556,10.185.6,3.1134.2
Cellular Component	GO:0005583	fibrillar collagen trimer	7	93	4.43697e-06	0.00232941	2.407.17,4.380.12,4.380.22,ENSOART00020014822,ENSOART00020027615,11.236.9,ENSOART00020019556
Cellular Component	GO:0098643	banded collagen fibril	7	93	4.43697e-06	0.00232941	ENSOART00020027615,11.236.9,ENSOART00020019556,2.407.17,4.380.12,4.380.22,ENSOART00020014822
Cellular Component	GO:0044420	extracellular matrix component	13	417	9.58169e-06	0.00452735	10.185.7,2.407.17,ENSOART00020014822,10.185.6,24.240.21,ENSOART00020019556,4.380.12,5.421.23,4.380.22,ENSOART00020027615,10.185.4,11.236.9,ENSOART00020039107
Cellular Component	GO:0098644	complex of collagen trimers	7	109	1.26826e-05	0.00544774	11.236.9,ENSOART00020019556,ENSOART00020027615,4.380.12,ENSOART00020014822,4.380.22,2.407.17
Biological Process	GO:0035384	thioester biosynthetic process	8	176	3.77601e-05	0.0137085	ENSOART00020037575,11.689.18,22.289.6,15.327.19,11.689.14,ENSOART00020040904,11.689.28,13.624.23
Biological Process	GO:0071616	acyl-CoA biosynthetic process	8	176	3.77601e-05	0.0137085	ENSOART00020037575,15.327.19,22.289.6,11.689.18,13.624.23,11.689.28,ENSOART00020040904,11.689.14
Molecular Function	GO:0004180	carboxypeptidase activity	6	89	4.06177e-05	0.0137085	ENSOART00020011609,13.548.1,13.546.2,ENSOART00020010727,13.548.2,13.548.4
Biological Process	GO:0090212	negative regulation of establishment of blood-brain barrier	2	2	4.91142e-05	0.014504	ENSOART00020040508,9.109.2
Molecular Function	GO:0008236	serine-type peptidase activity	12	420	4.89688e-05	0.014504	ENSOART00020018239,ENSOART00020011609,13.548.1,ENSOART00020010727,13.548.2,19.610.4,1.1802.4,13.546.2,18.60.1,17.223.10,13.548.4,ENSOART00020039407
Biological Process	GO:0060215	primitive hemopoiesis	4	30	5.65024e-05	0.0153879	ENSOART00020037589,17.227.7,ENSOART00020018211,ENSOART00020017899
Molecular Function	GO:0017171	serine hydrolase activity	12	428	5.86207e-05	0.0153879	ENSOART00020018239,13.548.1,ENSOART00020011609,ENSOART00020010727,13.548.2,1.1802.4,19.610.4,13.546.2,18.60.1,ENSOART00020039407,13.548.4,17.223.10
Cellular Component	GO:0005576	extracellular region	98	9769	6.74805e-05	0.0167813	4.18.1,11.367.4,14.212.12,ENSOART00020001277,3.1637.3,ENSOART00020022280,ENSOART00020033210,ENSOART00020033617,1.2008.6,ENSOART00020000316,ENSOART00020016003,3.1551.4,24.240.21,2.696.7,14.61.2,2.1185.3,13.548.2,19.595.5,1.150.1,4.611.4,15.436.1,ENSOART00020008230,25.77.1,25.77.19,13.548.1,ENSOART00020016545,1.15.3,ENSOART00020006971,1.2007.14,25.63.1,ENSOART00020012981,2.348.4,ENSOART00020039107,…
Molecular Function	GO:0048407	platelet-derived growth factor binding	6	106	0.000107934	0.0254993	ENSOART00020027615,11.236.9,1.2007.14,2.407.17,4.380.12,4.380.22
Biological Process	GO:0030199	collagen fibril organization	7	159	0.000140873	0.0301285	ENSOART00020014822,4.380.22,4.380.12,2.407.17,ENSOART00020019556,11.236.9,ENSOART00020027615
Biological Process	GO:0046909	intermembrane transport	2	3	0.000146657	0.0301285	ENSOART00020040508,9.109.2
Cellular Component	GO:0044421	extracellular region part	90	8956	0.000146252	0.0301285	ENSOART00020008267,ENSOART00020040007,12.202.3,ENSOART00020027615,2.925.5,ENSOART00020002666,11.236.9,2.407.17,10.185.6,ENSOART00020019556,ENSOART00020010727,24.433.6,24.484.24,ENSOART00020039407,4.380.12,1.2044.5,7.720.5,5.653.11,2.1482.7,11.689.18,13.15.2,ENSOART00020014822,ENSOART00020018239,ENSOART00020040904,11.689.28,12.119.3,5.343.1,18.60.1,13.546.2,3.505.27,ENSOART00020032780,10.185.7,ENS…
Biological Process	GO:0006084	acetyl-CoA metabolic process	7	165	0.000177048	0.0310464	11.689.18,ENSOART00020037575,15.327.19,ENSOART00020040904,11.689.14,11.689.28,13.624.23
Biological Process	GO:0006633	fatty acid biosynthetic process	11	411	0.000177408	0.0310464	11.99.3,ENSOART00020037575,24.484.24,11.99.15,4.611.4,11.689.28,ENSOART00020040904,22.289.14,11.689.18,ENSOART00020006006,22.289.6
Biological Process	GO:0006637	acyl-CoA metabolic process	9	279	0.000175115	0.0310464	ENSOART00020037575,24.484.24,ENSOART00020040904,11.689.14,11.689.28,13.624.23,11.689.18,22.289.6,15.327.19
Biological Process	GO:0035383	thioester metabolic process	9	279	0.000175115	0.0310464	22.289.6,15.327.19,11.689.18,13.624.23,ENSOART00020040904,11.689.14,11.689.28,24.484.24,ENSOART00020037575
Biological Process	GO:0043200	response to amino acid	9	286	0.000210441	0.0335387	4.380.22,4.380.12,ENSOART00020029639,1.2007.14,ENSOART00020037081,11.236.9,ENSOART00020027615,2.407.17,ENSOART00020019556
Biological Process	GO:0071230	cellular response to amino acid stimulus	8	225	0.00020781	0.0335387	2.407.17,ENSOART00020019556,4.380.12,4.380.22,1.2007.14,ENSOART00020037081,11.236.9,ENSOART00020027615
Molecular Function	GO:0008235	metalloexopeptidase activity	6	120	0.000212944	0.0335387	ENSOART00020010727,13.548.2,13.546.2,13.548.1,ENSOART00020011609,13.548.4
Cellular Component	GO:0005584	collagen type I trimer	4	45	0.000282785	0.0431019	11.236.9,ENSOART00020027615,4.380.12,4.380.22
Molecular Function	GO:0008431	vitamin E binding	2	4	0.000291952	0.0431085	ENSOART00020040508,9.109.2
Biological Process	GO:0019732	antifungal humoral response	3	19	0.000305359	0.0437219	ENSOART00020000316,ENSOART00020039407,19.610.4
Molecular Function	GO:0005488	binding	225	27943	0.000327348	0.0454918	10.307.3,ENSOART00020001277,3.1637.3,21.388.2,ENSOART00020021713,8.186.1,ENSOART00020023180,3.1558.1,ENSOART00020021850,ENSOART00020020185,ENSOART00020000316,ENSOART00020014292,3.90.1,ENSOART00020014165,14.668.5,14.61.2,11.493.5,3.1551.4,17.227.7,1.150.1,11.99.3,19.228.2,19.69.1,25.77.1,1.803.4,ENSOART00020041450,ENSOART00020021692,ENSOART00020016545,14.147.2,20.166.1,2.768.20,ENSOART00020022154,…
Biological Process	GO:0070208	protein heterotrimerization	6	132	0.000355859	0.0469065	1.2007.14,4.380.12,4.380.22,ENSOART00020027615,1.2008.6,11.236.9
Molecular Function	GO:0016421	CoA carboxylase activity	3	20	0.000357383	0.0469065	16.42.4,ENSOART00020006006,ENSOART00020037575
Biological Process	GO:0010941	regulation of cell death	39	3133	0.000378189	0.0471296	19.610.4,X.403.5,ENSOART00020034576,2.1185.3,ENSOART00020007607,22.211.4,ENSOART00020040605,ENSOART00020032396,ENSOART00020001277,9.53.1,ENSOART00020021850,ENSOART00020020185,6.218.10,19.632.9,19.219.12,ENSOART00020018211,ENSOART00020014049,ENSOART00020022666,ENSOART00020017899,ENSOART00020029639,ENSOART00020002666,2.925.5,ENSOART00020037589,25.77.1,20.408.6,2.1482.7,19.583.4,ENSOART00020021692,E…
Biological Process	GO:0042981	regulation of apoptotic process	37	2917	0.000379032	0.0471296	ENSOART00020018239,ENSOART00020005552,ENSOART00020006293,ENSOART00020021692,19.583.4,13.129.2,16.20.5,20.408.6,2.1482.7,7.720.5,2.348.4,3.438.2,ENSOART00020013038,ENSOART00020039407,ENSOART00020018211,19.219.12,19.632.9,ENSOART00020037589,2.925.5,ENSOART00020002666,ENSOART00020029639,ENSOART00020017899,ENSOART00020022666,ENSOART00020014049,9.53.1,ENSOART00020001277,ENSOART00020032396,6.218.10,ENS…
