# Supplementary material for: Integrative analysis of Iso-Seq and RNA-seq data reveals transcriptome complexity and differentially expressed transcripts in sheep tail fat
Source: PeerJ. 2021 Nov 3;9:e12454. doi: 10.7717/peerj.12454 (PMC8571958; doi:10.7717/peerj.12454)
Supplement: Supplemental Information 9 [file peerj-09-12454-s009.xlsx]

## Sheet: KEGG
Pathway Hierarchy1	Pathway Hierarchy2	KEGG Pathway	Pathway ID	Gene Number	Background number	P-Value	Q-Value	Gene IDs
Environmental Information Processing	Signaling molecules and interaction	ECM-receptor interaction	ko04512	14	472	6.70585e-06	0.00060688	4.380.22,11.236.16,3.143.5,10.185.4,10.185.6,10.185.7,4.380.12,ENSOART00020039107,12.528.5,1.2008.6,1.2007.14,ENSOART00020027615,ENSOART00020006511,11.236.9
Organismal Systems	Digestive system	Protein digestion and absorption	ko04974	17	678	6.55508e-06	0.00060688	4.380.12,1.2008.6,11.236.9,24.240.21,4.380.22,1.2005.2,11.236.16,10.185.4,10.185.7,1.2007.14,ENSOART00020027615,ENSOART00020019556,10.185.6,2.407.17,ENSOART00020002400,ENSOART00020002481,14.563.1
Cellular Processes	Cellular community - eukaryotes	Focal adhesion	ko04510	20	1042	4.86989e-05	0.00293817	11.195.8,ENSOART00020020698,1.2007.14,12.528.5,ENSOART00020001307,ENSOART00020027615,ENSOART00020037589,10.185.6,17.523.2,ENSOART00020006293,1.2008.6,ENSOART00020006511,11.236.9,4.380.12,ENSOART00020039107,10.185.4,10.185.7,19.632.9,4.380.22,11.236.16
Environmental Information Processing	Signal transduction	PI3K-Akt signaling pathway	ko04151	24	1505	0.000155963	0.00705732	ENSOART00020037589,ENSOART00020027615,1.2007.14,12.528.5,ENSOART00020001307,17.523.2,1.469.1,ENSOART00020006293,ENSOART00020020185,10.185.6,ENSOART00020039107,4.380.12,21.169.5,11.236.9,ENSOART00020006511,1.2008.6,11.236.16,19.632.9,4.380.22,10.185.7,ENSOART00020014165,16.116.3,10.185.4,13.681.4
Environmental Information Processing	Signal transduction	AMPK signaling pathway	ko04152	15	773	0.000377705	0.0136729	ENSOART00020037575,1.469.1,ENSOART00020006293,ENSOART00020040904,4.611.4,14.746.57,11.99.3,14.746.81,14.746.46,12.578.4,22.289.14,ENSOART00020006006,ENSOART00020040605,11.99.15,11.265.3
Metabolism	Lipid metabolism	Fatty acid biosynthesis	ko00061	5	113	0.0011797	0.0355875	11.99.3,ENSOART00020006006,ENSOART00020040904,ENSOART00020037575,11.99.15
